# Supplementary material for: Acceptability of OP/Na swabbing for SARS-CoV-2: a prospective observational cohort surveillance study in Western Australian schools
Source: PubMed Central journal article supplement — BMJ Open. 2022 Jan 26;12(1):e055217. doi: 10.1136/bmjopen-2021-055217 (PMC8808315; doi:10.1136/bmjopen-2021-055217), 2022-01-26
Supplement: bmjopen-2021-055217.draft_revisions.pdf [file bmjopen-2021-055217.draft_revisions.pdf]

# BMJ Open

BMJ Open is committed to open peer review. As part of this commitment we make the peer review history of every article we publish publicly available.

When an article is published we post the peer reviewers' comments and the authors' responses online. We also post the versions of the paper that were used during peer review. These are the versions that the peer review comments apply to.

The versions of the paper that follow are the versions that were submitted during the peer review process. They are not the versions of record or the final published versions. They should not be cited or distributed as the published version of this manuscript.

BMJ Open is an open access journal and the full, final, typeset and author-corrected version of record of the manuscript is available on our site with no access controls, subscription charges or pay-per-view fees (<http://bmjopen.bmj.com>).

If you have any questions on BMJ Open's open peer review process please email [info.bmjopen@bmj.com](mailto:info.bmjopen@bmj.com)

# BMJ Open

## SARS-CoV-2 swabbing: An efficient and well-accepted method

|                               |                                                                                                                                                                                                                                                                                                                                                                                                                                                                                                                                                                                                                                                                                                                                                                                                                                                                                                                                                                                                                                                                                                                                                                                                                                                                                                                                                                                                                                     |
|-------------------------------|-------------------------------------------------------------------------------------------------------------------------------------------------------------------------------------------------------------------------------------------------------------------------------------------------------------------------------------------------------------------------------------------------------------------------------------------------------------------------------------------------------------------------------------------------------------------------------------------------------------------------------------------------------------------------------------------------------------------------------------------------------------------------------------------------------------------------------------------------------------------------------------------------------------------------------------------------------------------------------------------------------------------------------------------------------------------------------------------------------------------------------------------------------------------------------------------------------------------------------------------------------------------------------------------------------------------------------------------------------------------------------------------------------------------------------------|
| Journal:                      | <i>BMJ Open</i>                                                                                                                                                                                                                                                                                                                                                                                                                                                                                                                                                                                                                                                                                                                                                                                                                                                                                                                                                                                                                                                                                                                                                                                                                                                                                                                                                                                                                     |
| Manuscript ID                 | bmjopen-2021-055217                                                                                                                                                                                                                                                                                                                                                                                                                                                                                                                                                                                                                                                                                                                                                                                                                                                                                                                                                                                                                                                                                                                                                                                                                                                                                                                                                                                                                 |
| Article Type:                 | Original research                                                                                                                                                                                                                                                                                                                                                                                                                                                                                                                                                                                                                                                                                                                                                                                                                                                                                                                                                                                                                                                                                                                                                                                                                                                                                                                                                                                                                   |
| Date Submitted by the Author: | 08-Jul-2021                                                                                                                                                                                                                                                                                                                                                                                                                                                                                                                                                                                                                                                                                                                                                                                                                                                                                                                                                                                                                                                                                                                                                                                                                                                                                                                                                                                                                         |
| Complete List of Authors:     | Thomas, Hannah; Telethon Kids Institute; Telethon Kids Institute, Wesfarmers Centre of Vaccines & Infectious Diseases<br>Mullane, Marianne; Telethon Kids Institute; Telethon Kids Institute, Wesfarmers Centre of Vaccines & Infectious Diseases<br>Ang, Sherlynn; Telethon Kids Institute<br>Barrow, Tina; Telethon Kids Institute<br>Leahy, Adele ; Telethon Kids Institute; Telethon Kids Institute, Wesfarmers Centre of Vaccines & Infectious Diseases<br>Whelan, Alexandra; Telethon Kids Institute; Telethon Kids Institute, Wesfarmers Centre of Vaccines & Infectious Diseases<br>Lombardi, Karen; Telethon Kids Institute; Edith Cowan University<br>Cooper, Matthew; Telethon Kids Institute<br>Stevenson, Paul; Telethon Kids Institute<br>Lester, Leanne; University of Western Australia<br>Padley, Andrea; Child and Adolescent Health Service<br>Sprigg, Lynn; Child and Adolescent Health Service<br>Speers, David; University of Western Australia; PathWest Laboratory Medicine Western Australia<br>Merritt, A; PathWest Laboratory Medicine Western Australia<br>Coffin, Juli; Telethon Kids Institute; University of Western Australia<br>Cross, Donna; Telethon Kids Institute; University of Western Australia<br>Gething, Peter; Telethon Kids Institute; Curtin University<br>Bowen, Asha; Telethon Kids Institute, Wesfarmers Centre of Vaccines & Infectious Diseases; University of Western Australia |
| Keywords:                     | COVID-19, Diagnostic microbiology < INFECTIOUS DISEASES, Public health < INFECTIOUS DISEASES                                                                                                                                                                                                                                                                                                                                                                                                                                                                                                                                                                                                                                                                                                                                                                                                                                                                                                                                                                                                                                                                                                                                                                                                                                                                                                                                        |
|                               |                                                                                                                                                                                                                                                                                                                                                                                                                                                                                                                                                                                                                                                                                                                                                                                                                                                                                                                                                                                                                                                                                                                                                                                                                                                                                                                                                                                                                                     |

SCHOLARONE™  
Manuscripts

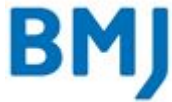

I, the Submitting Author has the right to grant and does grant on behalf of all authors of the Work (as defined in the below author licence), an exclusive licence and/or a non-exclusive licence for contributions from authors who are: i) UK Crown employees; ii) where BMJ has agreed a CC-BY licence shall apply, and/or iii) in accordance with the terms applicable for US Federal Government officers or employees acting as part of their official duties; on a worldwide, perpetual, irrevocable, royalty-free basis to BMJ Publishing Group Ltd ("BMJ") its licensees and where the relevant Journal is co-owned by BMJ to the co-owners of the Journal, to publish the Work in this journal and any other BMJ products and to exploit all rights, as set out in our [licence](#).

The Submitting Author accepts and understands that any supply made under these terms is made by BMJ to the Submitting Author unless you are acting as an employee on behalf of your employer or a postgraduate student of an affiliated institution which is paying any applicable article publishing charge ("APC") for Open Access articles. Where the Submitting Author wishes to make the Work available on an Open Access basis (and intends to pay the relevant APC), the terms of reuse of such Open Access shall be governed by a Creative Commons licence – details of these licences and which [Creative Commons](#) licence will apply to this Work are set out in our licence referred to above.

Other than as permitted in any relevant BMJ Author's Self Archiving Policies, I confirm this Work has not been accepted for publication elsewhere, is not being considered for publication elsewhere and does not duplicate material already published. I confirm all authors consent to publication of this Work and authorise the granting of this licence.

## SARS-CoV-2 swabbing: An efficient and well-accepted method

Thomas H M<sup>1,2</sup>, Mullane M<sup>1,2</sup>, Ang S<sup>1</sup>, Barrow T<sup>1</sup>, Leahy A<sup>1,2</sup>, Whelan A<sup>1,2</sup>, Lombardi K<sup>1,3</sup>, Cooper M<sup>1</sup>,  
Stevenson P G<sup>1</sup>, Lester L<sup>4</sup>, Padley A<sup>5</sup>, Sprigg L<sup>5</sup>, Speers D J<sup>4,6</sup>, Merritt A J<sup>6</sup>, Coffin J<sup>1,4</sup>, Cross D<sup>1,4</sup>, Gething P<sup>1,7</sup>,  
Bowen A C<sup>1,2,4,5</sup>

<sup>1</sup>Telethon Kids Institute, Perth, Western Australia, Australia

<sup>2</sup>Wesfarmers Centre of Vaccines & Infectious Diseases, Telethon Kids Institute, Perth, Western Australia, Australia

<sup>3</sup>Edith Cowan University, Perth, Western Australia, Australia

<sup>4</sup>University of Western Australia, Perth, Western Australia, Australia

<sup>5</sup>Child and Adolescent Health Service, Perth, Western Australia, Australia

<sup>6</sup>Pathwest Laboratory Medicine Western Australia, Perth, Western Australia, Australia

<sup>7</sup>Curtin University, Perth, Western Australia, Australia

### Corresponding author:

Hannah M Thomas

Hannah.thomas@telethonkids.org.au

+614 31 971 803

### Key words:

SARS-CoV-2, swabbing, discomfort, screening, COVID-19

### Word count:

2,046

## Abstract

**Objectives:** When the COVID-19 pandemic was declared, Governments responded with lockdown and isolation measures to combat viral spread, including the closure of many schools. More than a year later, widespread screening for SARS-CoV-2 is critical to allow schools and other institutions to remain open. Here we describe the acceptability of a minimally-invasive COVID-19 screening protocol trialled by the Western Australian (WA) Government to mitigate the risks of and boost public confidence in schools remaining open.

**Methods:** Asymptomatic students and staff in 40 schools were swabbed monthly between June and September 2020. To minimise discomfort, and optimise recruitment and tolerability in unaccompanied children, a combined throat and nasal (OP/Na) swab was chosen over the nasopharyngeal swab commonly used, despite slightly reduced test performance. PCR testing was performed with a two-step diagnostic and independent confirmatory PCR for any diagnostic PCR positives. Concurrent surveys evaluated participant experiences of in-school swabbing.

**Results:** 13,988 swabs were collected from students and staff. There were zero positive test results for SARS-CoV-2, including no false positives. Participants reported high acceptability: 71% of students reported no or minimal discomfort and most were willing to be re-swabbed (4% refusal rate).

**Conclusions:** OP/Na swabbing is acceptable and repeatable in schoolchildren as young as 4 years old and may combat noncompliance rates by significantly increasing the acceptability of testing. This kind of minimally-invasive testing will be key to the success of ongoing, voluntary mass screening as society adjusts to a new 'normal' in the face of COVID-19.

## Article Summary

### Strengths:

- Participation of 40 Western Australian schools, with broad representation across geography, socioeconomic demographics and school type.
- Minimally invasive SARS-CoV-2 swabbing method, likely to enhance rates of active consent and participation in COVID-19 screening.

### Limitations:

- Pragmatic, budgetary and logistical considerations limit the sample size of this study.
- School selection was purposeful, not random, to ensure inclusion of a diverse sample. The possibility for bias will be addressed at the data analysis stage.

## Introduction

In late 2019 the SARS-CoV-2 virus emerged, and shortly thereafter, a global pandemic was declared (1). Governments responded with lockdown and isolation measures to combat the spread of COVID-19, including the closure of many schools (2). Quickly, it became clear that building capacity to test for COVID-19 rapidly and accurately would be critical for public safety and confidence in the reopening of schools. Here, we describe the results of the DETECT Schools Study, launched in Western Australia (WA), Australia, to trial a minimally invasive method for asymptomatic SARS-CoV-2 virus screening in primary and secondary schools across the state where children were swabbed unaccompanied by parents or caregivers.

The mandate of the DETECT Schools Study was simple: to screen asymptomatic students and staff swiftly and effectively for SARS-CoV-2 without causing discomfort. This speaks to a broader global need for transformative approaches to SARS-CoV-2 testing, as screening for the new virus becomes a part of daily life. As society grapples with a new 'normal', individuals with respiratory symptoms, those working in high-risk environments and those returning from travel are being swabbed regularly for SARS-CoV-2 in an effort to protect their communities.

At the onset of the COVID-19 pandemic, nasopharyngeal (NP) swabbing for polymerase chain reaction (PCR) detection of SARS-CoV-2 was rapidly adopted globally as the gold standard for COVID-19 diagnosis (3), however the validation of less invasive methods for virus detection is necessary to optimise compliance and increase the reach of mass screening programs moving forwards.

At the time of this study, antigen tests were not yet available. Saliva sample PCR testing had emerged as a practical and non-invasive sampling method for the detection of SARS-CoV-2 in symptomatic (4) and asymptomatic people (5), but there are conflicting studies concerning sensitivity, with some reporting similar detection rates to NP swabbing (6–8) while others indicate low sensitivity (9) and caution against reliance on saliva samples alone for SARS-CoV-2 screening (10). Similarly, oropharyngeal (OP) swabbing is supported by some studies (11) but displays inferior performance to NP

1  
2  
3 swabbing in others (12). Nasal (Na) swabs offer another minimally invasive alternative with reasonable sensitivity  
4 (13,14), which are found to be more sensitive than throat swabs for SARS-CoV-2 detection in children (15) and are  
5  
6 suited to high volume screening with a confirmatory NP swab. However, nasal swabs collected late in the disease course  
7  
8 are less sensitive than NP samples (16), and modelling suggests that this sampling technique in isolation does not  
9  
10 effectively capture patients with a low viral load (17).  
11  
12  
13

14  
15 Nasal swabbing has previously been found to be more comfortable and only marginally less sensitive than NP sampling  
16  
17 for the detection of influenza (18). Pairing a nasal swab with an OP swab offers a minimally invasive method for SARS-  
18  
19 CoV-2 detection, with studies indicating specificity equivalent to and sensitivity marginally reduced (~3%) from that of  
20  
21 NP swabbing (19–21). This sensitivity is reportedly retained when allowing self-collection (22) or varying the swab type  
22  
23 used (23). Harnessing the sensitivity of both sampling techniques may maximise the chances of viral detection while  
24  
25 remaining minimally invasive. So, does the use of OP/Na swabbing minimise discomfort enough to justify this small  
26  
27 sacrifice in sensitivity? Here we report the use of OP/Na swabbing to rapidly screen for SARS-CoV-2 in a large school-  
28  
29 based cohort of volunteers, with an aim to optimise comfort and acceptability without losing sensitivity and specificity.  
30  
31  
32

## 33 34 **Methods**

35  
36  
37  
38 The state of WA is vast, covering one third the landmass of Australia. The population is concentrated in the capital city  
39  
40 of Perth (2.1 million), with the remaining 400,000 people spread across the State's 2.6 million square kilometres. There  
41  
42 are 1,131 schools across the state: 818 of these are public (Government) schools, at which a total of 315,148 students  
43  
44 were enrolled in 2020 (24).  
45  
46

47  
48 The study protocol is published (25). Briefly, 40 public schools (28,331 enrolled students and 4,023 employed staff)  
49  
50 were purposefully selected by the WA Department of Education for participation in the study, ensuring representative  
51  
52 inclusion of education support schools, residential colleges, and regional schools. Students aged 4 – 18 years were  
53  
54 eligible, with two-thirds at metropolitan schools and one-third at regional schools from across the state (Figure 1).  
55  
56  
57



1  
2  
3 Prior to study commencement, written and video study and consent information was distributed by the schools to staff  
4 and parents. Staff and parents provided active consent through an online portal supported by the REDCap platform  
5  
6 (26). Randomly selected consenting participants (n=150; 90% students, 10% staff) were swabbed at each school in each  
7  
8 round unless the school was not large enough to facilitate, in which case as many participants as possible were  
9  
10 swabbed. Consented participants could subsequently refuse swabbing or withdraw from the study at any time.  
11  
12

13  
14  
15 SARS-CoV-2 swabbing of consented students and staff was carried out in the schools over three rounds between June  
16  
17 and September 2020. We employed a combined oropharyngeal and nasal flocked swab (OP/Na) (22, 23). During study  
18  
19 development, swab comfort was investigated with a group of paediatric volunteers: the CITOSWAB flocked swab (Gaia  
20  
21 Science, Singapore) was selected as the preferred swab for OP/Na sampling.  
22  
23

24  
25 Nurses received training in personal protective equipment (masks, gowns, eyewear and gloves) donning and doffing  
26  
27 and swabbing technique before commencing the swabbing study in schools. Using a side-to-side motion, the swab was  
28  
29 first swept across the back of the pharynx at least once in each direction, including both tonsils. The same swab was  
30  
31 then inserted into one nostril (chosen by the child) along the floor of the nasal cavity parallel to the palate until  
32  
33 resistance was encountered, rotated gently five times, withdrawn, and placed in the sheath containing viral transport  
34  
35 medium (CITOSWAB, Gaia Science, Singapore). Swabs were transported to the WA public laboratory service provider  
36  
37 in Perth, WA, and tested for SARS-CoV-2 using an in-house PCR platform modified from the WHO recommended assay  
38  
39 (27) to include an inhibitor control, which detects the pan-sarbecovirus E gene. Validation studies of the PCR were  
40  
41 performed early in the pandemic and confirmed a high analytical sensitivity and specificity with appropriate positive  
42  
43 and negative controls. Any swab returning an in-house PCR positive result (CT value < 45) was subject to confirmatory  
44  
45 testing with the Cepheid Xpert Xpress SARS-CoV-2 assay (BioMerieux, France). In-house and confirmatory PCR  
46  
47 detections were reported as positive.  
48  
49  
50

51  
52 Surveys were administered to a subset of swabbing participants in the two weeks following the first round of swabbing  
53  
54 in each school, and again a month after the completion of all swabbing rounds. Surveys asked about participant  
55  
56  
57  
58  
59  
60

1  
2  
3 experiences of swabbing, including the level of discomfort, concern and disruption associated with in-school testing.  
4  
5 Parents were also surveyed about their child's swabbing experience. The surveys were administered during school  
6  
7 classes for students and through personal email for staff and parents. Complete survey tools have been published  
8  
9 previously (25).  
10  
11  
12

### 13 **Patient and public involvement**

14  
15 Community involvement and advice was actively sought in the design and preparation of this study. Procedures and  
16  
17 resources were reviewed and approved by a National Community Advisory Group for COVID-19 Research, convened  
18  
19 by the Telethon Kids Institute and comprising community members from across Australia, including Aboriginal  
20  
21 members. The Telethon Kids Institute Kulunga Aboriginal Research Development Unit consulted on study resource  
22  
23 development, including culturally-secure and informed consent processes and measures to supporting Aboriginal  
24  
25 families.  
26  
27  
28

### 29 **Ethics approval statement**

30  
31 Ethical approval was obtained from the WA Child and Adolescent Health Service (PRN RGS0000004059) and the WA  
32  
33 Aboriginal Health Ethics Committee (PRN 993).  
34  
35  
36  
37  
38  
39  
40  
41  
42  
43  
44  
45  
46  
47  
48  
49  
50  
51  
52  
53  
54  
55  
56  
57  
58  
59  
60

## Results

1,458 school staff members and the parents of 7,386 students engaged with the online consent platform. 7,281 of these students (98.6%) and 1,321 staff (90.6%) consented to be swabbed. Over the three rounds, 13,988 swabs were collected from 5,903 students and 1,036 staff (Table 1).

Table 1. Demographics of school students and staff participating in swabbing.

|                                                 |                | Students      | Staff         |
|-------------------------------------------------|----------------|---------------|---------------|
| <b>Total participants</b>                       |                | 5,903         | 1,036         |
| <b>Gender</b>                                   | Female         | 2,636 (44.7%) | 563 (54.3%)   |
|                                                 | Male           | 3,255 (55.1%) | 473 (45.7%)   |
|                                                 | Other          | 12 (0.2%)     | 0 (0%)        |
| <b>Aboriginal and/or Torres Strait Islander</b> | Yes            | 328 (5.6%)    | 11 (1.1%)     |
|                                                 | No             | 5,006 (84.8%) | 1,022 (98.6%) |
|                                                 | Not identified | 569 (9.6%)    | 3 (0.3%)      |
| <b>Area</b>                                     | Metropolitan   | 4,479 (75.9%) | 812 (78.4%)   |
|                                                 | Regional       | 1,424 (24.1%) | 224 (21.6%)   |

Swabs were collected from across the state, and results provided by text message to all participating families and staff within 72 hours of sample collection. All but one sample returned negative results on the in-house PCR platform, and confirmatory Xpert testing of the in-house PCR detection returned a negative result. As such, none of the 13,988 samples collected were positive for SARS-CoV-2. This was consistent with no cases of local SARS-CoV-2 transmission reported in WA throughout the study period.

1  
2  
3 5,349 students and 911 staff were randomised to be swabbed more than once across the three rounds. Of these  
4  
5 participants, 214 students (4%) and 12 staff (1.3%) declined to be swabbed again (declined on the day or withdrew  
6  
7 from the study).  
8  
9

10 After the first round of swabbing, the majority of student respondents indicated on a five-point scale (none, mild,  
11  
12 moderate, painful, very painful) no more than mild discomfort (no discomfort: 19.7%; mild discomfort: 51.0%) (Figure  
13  
14 2A). Most of the remaining students reported moderate discomfort (20.5%), with few indicating that the swabbing was  
15  
16 painful (painful: 6.5%; very painful: 2.3%). The majority of staff who had been swabbed also indicated only mild (59.4%)  
17  
18 or no (19.6%) discomfort during the procedure.  
19  
20  
21  
22  
23

24 Most students reported feeling only a little (37.2%) or not at all (47.3%) concerned about participating in testing (Figure  
25  
26 2B). The parents of participating students also reported on their child's levels of concern, with the majority of parents  
27  
28 observing little (28.4%) or no (60.8%) concern in their children.  
29  
30  
31  
32

33 Participating students were also asked whether they had been concerned about swabbing nurses wearing PPE at their  
34  
35 school. For the most part, students reported only a little or no concern about this. Primary school students were slightly  
36  
37 more likely to be at least moderately concerned (10%) than secondary students (5%).  
38  
39  
40  
41

42 After three rounds of swabbing, surveys were administered again to an unmatched subset of swabbing participants.  
43  
44 Response distributions were comparable to those described for the first survey cycle, with the majority of those  
45  
46 surveyed still indicating mild levels of discomfort and concern after ongoing testing.  
47  
48  
49  
50  
51  
52  
53  
54  
55  
56  
57  
58  
59  
60

## Discussion

Efficient, accurate SARS-CoV-2 screening will be key to ameliorating the progression of the COVID-19 pandemic. As epidemiological evidence suggests that asymptomatic and pre-symptomatic individuals play a significant role in propagating the transmission of the virus (28–30), in low prevalence settings like WA the screening of asymptomatic populations will continue to be important to prevent a rise in cases. Without the indication of symptoms, this mode of screening requires good will and voluntary participation and must therefore strike a balance between optimising both testing sensitivity and participant comfort. As the discomfort associated with nasopharyngeal SARS-CoV-2 swabbing techniques risks poor adherence to mass screening campaigns (31), alternative approaches will be necessary to cultivate the consistency and reliability of public swabbing adherence necessary moving forwards.

For school-aged children, closing schools to combat the spread of COVID-19 must be balanced against the very real challenges in mental health and inequality likely associated with missing out on the educational and social benefits of school attendance (32,33). Consequently, countries around the world have mobilised to implement mass testing in an effort to support the reopening of schools and other establishments. Refinement of a robust and well-accepted screening mechanism will support the continuation of education; however very little data is available on the acceptability of various swabbing procedures and how this may impact adherence to screening programs.

Through the DETECT Schools Study we have evaluated the acceptability of OP/Na sampling, reported to facilitate SARS-CoV-2 detection with limited or no sacrifice in sensitivity compared to the standard NP procedure (18,34), in a school setting. Sampling was conducted with a flocked nylon swab: while evidence suggests that cotton, synthetic, flocked, and non-flocked swabs all exhibit comparable performance for SARS-CoV-2 detection (35), flocked swabs have previously been shown to deliver a higher yield when swabbing for other respiratory viruses (36).

In a large, representative cohort of school students and staff, our findings indicate that the vast majority of participants experienced minimal or no discomfort during an OP/Na swab. Almost all of those who were asked to participate a

1  
2  
3 second time agreed, illustrating the high tolerance for repeat procedures which is desirable for optimised respiratory  
4 screening programs. Decreased discomfort is also likely to be associated with a reduced possibility of coughing, gagging  
5 or sneezing during sampling, in turn decreasing the risk of viral exposure for healthcare staff. While potentially not  
6 acceptable in specific settings with vulnerable groups for which sensitivity is paramount, such as entry screening for  
7 nursing homes (37), we argue that in schools and other similar settings this small decrease in sensitivity is far  
8 outweighed by high rates of consent and compliance which will allow for widespread testing.  
9  
10  
11  
12  
13  
14  
15  
16  
17

## 18 Conclusion

19  
20  
21 Here we report an approach to large-scale asymptomatic swabbing for SARS-CoV-2 leading to high levels of willingness  
22 to participate. The sensitivity of this method for the identification of SARS-CoV-2 is supported by other studies. This  
23 methodology for screening children was well received by a large cohort and could be utilised to screen for  
24 asymptomatic SARS-CoV-2 in other settings, mitigating the requirements for uncomfortable NP sampling and leading  
25 to enhanced compliance with programs designed to prevent onwards transmission of SARS-CoV-2.  
26  
27  
28  
29  
30  
31  
32  
33  
34  
35  
36  
37  
38  
39  
40  
41  
42  
43  
44  
45  
46  
47  
48  
49  
50  
51  
52  
53  
54  
55  
56  
57  
58  
59  
60

## Funding

This work was supported by the Western Australian Department of Health [DoH20205875].

Donna Cross' contribution to this paper was supported by a National Health and Medical Research Council Research Fellowship [GNT 1119339].

Asha Bowen receives an Investigator Award from the National Health and Medical Research Council of Australia [GNT1175509].

Peter Gething's contribution to this paper was supported by Channel 7 Telethon Trust, Western Australia.

## Data availability statement

DETECT Schools Study deidentified participant data is shared with study partners (WA Departments of Health and Education) but is not available to the public. The study protocol is published at <https://doi.org/10.3389/fpubh.2021.636921>.

## Acknowledgements

We would like to acknowledge and thank staff from PathWest, the WA Child and Adolescent Health Service and the WA Country Health Service for their valuable contribution to the DETECT Schools Study. We also thanks all students and staff who participated in swabbing.

## Author contributions

Hannah Thomas (HT) coordinated data collection, contributed to data analysis, conducted the literature search, generated figures and drafted the manuscript.

1  
2  
3 Marianne Mullane (MM) coordinated the conception and design of the study, coordinated data collection and  
4  
5 provided critical revision of drafts.  
6

7  
8 Sherlynn Ang (SA), Tina Barrow (TB), Adele Leahy (AL), Alex Whelan (AW) coordinated data collection and provided  
9  
10 critical revision of drafts.  
11

12  
13 Karen Lombardi (KL) coordinated and provided critical revision of drafts.  
14

15  
16 Matthew Cooper (MC), Paul Stevenson (PS), Leanne Lester (LL) and David Spears (DS) contributed to data analysis and  
17  
18 provided critical revision of drafts.  
19

20  
21 Adam Merritt (AM) contributed to design of test workflow, data analysis and provided critical revision of drafts.  
22

23  
24 Andrea Padley (AP) and Lyn Sprigg (LS) contributed to data collection and provided critical revision of drafts.  
25

26  
27 Juli Coffin (JC), Donna Cross (DC), Peter Gething (PG) and Asha Bowen (AB) oversaw conception, design and  
28  
29 coordination of the study and provided critical revision of drafts.  
30

## 31 32 **Competing interests**

33  
34  
35  
36  
37 Telethon Kids Institute authors report grants from the Western Australian Department of Health during the conduct  
38  
39 of this study.  
40

41  
42 Donna Cross and Asha Bowen report grants from the Western Australian Department of Health outside the  
43  
44 submitted work.  
45

46  
47 Asha Bowen, Andrea Padley, Lyn Sprigg, David Speers and Adam Merritt are employees of the Western Australian  
48  
49 Department of Health.  
50



## References

1. Du Toit A. Outbreak of a novel coronavirus. *Nat Rev*. 2020;18(1):123.
2. Viner RM, Russell SJ, Croker H, Packer J, Ward J, Stansfield C, et al. School closure and management practices during coronavirus outbreaks including COVID-19: a rapid systematic review. *Lancet Child Adolesc Heal* [Internet]. 2020;4(5):397–404. Available from: [http://dx.doi.org/10.1016/S2352-4642\(20\)30095-X](http://dx.doi.org/10.1016/S2352-4642(20)30095-X)
3. World Health Organisation. Laboratory testing for coronavirus disease 2019 (COVID-19) in suspected human cases: interim guidance. [Internet]. 2020. Available from: <https://apps.who.int/iris/bitstream/handle/10665/331329/WHO-COVID-19-laboratory-2020.4-eng.pdf>
4. Azzi L, Carcano G, Gianfagna F, Grossi P, Gasperina DD, Genoni A, et al. Saliva is a reliable tool to detect SARS-CoV-2. *J Infect*. 2020 Jul;81(1):e45–50.
5. Yokota I, Shane PY, Okada K, Unoki Y, Yang Y, Inao T, et al. Mass screening of asymptomatic persons for SARS-CoV-2 using saliva. *Clin Infect Dis an Off Publ Infect Dis Soc Am*. 2020 Sep;
6. Vaz SN, Santana DS de, Netto EM, Pedroso C, Wang W-K, Santos FDA, et al. Saliva is a reliable, non-invasive specimen for SARS-CoV-2 detection. *Brazilian J Infect Dis an Off Publ Brazilian Soc Infect Dis*. 2020 Aug;
7. To KK-W, Tsang OT-Y, Yip CC-Y, Chan K-H, Wu T-C, Chan JM-C, et al. Consistent Detection of 2019 Novel Coronavirus in Saliva. *Clin Infect Dis an Off Publ Infect Dis Soc Am*. 2020 Jul;71(15):841–3.
8. Chen JH-K, Yip CC-Y, Poon RW-S, Chan K-H, Cheng VC-C, Hung IF-N, et al. Evaluating the use of posterior oropharyngeal saliva in a point-of-care assay for the detection of SARS-CoV-2. *Emerg Microbes Infect*. 2020 Dec;9(1):1356–9.
9. Lin C, Xiang J, Yan M, Li H, Huang S, Shen C. Comparison of throat swabs and sputum specimens for viral nucleic acid detection in 52 cases of novel coronavirus (SARS-Cov-2)-infected pneumonia (COVID-19). *Clin*

- 1  
2  
3 Chem Lab Med. 2020 Jun;58(7):1089–94.  
4  
5  
6 10. Riccò M, Ranzieri S, Peruzzi S, Valente M, Marchesi F, Balzarini F, et al. RT-qPCR assays based on saliva rather  
7 than on nasopharyngeal swabs are possible but should be interpreted with caution: results from a systematic  
8 review and meta-analysis. *Acta Biomed.* 2020 Sep;91(3):e2020025.  
9  
10  
11  
12  
13 11. Calame A, Mazza L, Renzoni A, Kaiser L, Schibler M. Sensitivity of nasopharyngeal, oropharyngeal, and nasal  
14 wash specimens for SARS-CoV-2 detection in the setting of sampling device shortage. *European Journal of*  
15 *Clinical Microbiology & Infectious Diseases.* 2020. p. 1–5.  
16  
17  
18  
19  
20 12. Wang X, Tan L, Wang X, Liu W, Lu Y, Cheng L, et al. Comparison of nasopharyngeal and oropharyngeal swabs  
21 for SARS-CoV-2 detection in 353 patients received tests with both specimens simultaneously. *Int J Infect Dis*  
22 *IJID Off Publ Int Soc Infect Dis.* 2020 May;94:107–9.  
23  
24  
25  
26  
27  
28 13. Tu Y-P, Jennings R, Hart B, Cangelosi GA, Wood RC, Wehber K, et al. Swabs Collected by Patients or Health  
29 Care Workers for SARS-CoV-2 Testing. Vol. 383, *The New England journal of medicine.* 2020. p. 494–6.  
30  
31  
32  
33 14. McCulloch DJ, Kim AE, Wilcox NC, Logue JK, Greninger AL, Englund JA, et al. Comparison of Unsupervised  
34 Home Self-collected Midnasal Swabs With Clinician-Collected Nasopharyngeal Swabs for Detection of SARS-  
35 CoV-2 Infection. *JAMA Netw open.* 2020 Jul;3(7):e2016382.  
36  
37  
38  
39  
40 15. Palmas G, Moriondo M, Trapani S, Ricci S, Calistri E, Pisano L, et al. Nasal swab as preferred clinical specimen  
41 for COVID-19 testing in children. *Pediatr Infect Dis J.* 2020;39(9):267–70.  
42  
43  
44  
45  
46 16. Pinninti S, Trieu C, Pati SK, Latting M, Cooper J, Seleme MC, et al. Comparing Nasopharyngeal and  
47 Midturbinate Nasal Swab Testing for the Identification of Severe Acute Respiratory Syndrome Coronavirus 2.  
48 *Clin Infect Dis [Internet].* 2020;72(7):1253–5. Available from: <https://doi.org/10.1093/cid/ciaa882>  
49  
50  
51  
52  
53 17. Callahan C, Lee R, Lee G, Zulauf KE, Kirby JE, Arnaout R. Nasal-Swab Testing Misses Patients with Low SARS-  
54 CoV-2 Viral Loads. *medRxiv : the preprint server for health sciences.* 2020.  
55  
56  
57  
58  
59  
60

18. Frazee BW, Rodríguez-Hoces de la Guardia A, Alter H, Chen CG, Fuentes EL, Holzer AK, et al. Accuracy and Discomfort of Different Types of Intranasal Specimen Collection Methods for Molecular Influenza Testing in Emergency Department Patients. *Ann Emerg Med*. 2018 Apr;71(4):509-517.e1.
19. LeBlanc JJ, Heinsteinst C, MacDonald J, Pettipas J, Hatchette TF, Patriquin G. A combined oropharyngeal/nares swab is a suitable alternative to nasopharyngeal swabs for the detection of SARS-CoV-2. *J Clin Virol* [Internet]. 2020;128(May):104442. Available from: <https://doi.org/10.1016/j.jcv.2020.104442>
20. Vlek ALM, Wesseliust TS, Achterberg R, Thijsen SFT. Combined throat/nasal swab sampling for SARS-CoV-2 is equivalent to nasopharyngeal sampling. *Eur J Clin Microbiol Infect Dis Off Publ Eur Soc Clin Microbiol*. 2020 Jul;1–3.
21. Tsang NNY, So HC, Ng KY, Cowling BJ, Leung GM, Ip DKM. Diagnostic performance of different sampling approaches for SARS-CoV-2 RT-PCR testing: a systematic review and meta-analysis. *Lancet Infect Dis* [Internet]. 2021 Apr 22; Available from: [https://doi.org/10.1016/S1473-3099\(21\)00146-8](https://doi.org/10.1016/S1473-3099(21)00146-8)
22. Wehrhahn MC, Robson J, Brown S, Bursle E, Byrne S, New D, et al. Self-collection: An appropriate alternative during the SARS-CoV-2 pandemic. *J Clin Virol Off Publ Pan Am Soc Clin Virol*. 2020 Jul;128:104417.
23. Patriquin G, Davis I, Heinsteinst C, MacDonald J, Hatchette TF, LeBlanc JJ. Exploring alternative swabs for use in SARS-CoV-2 detection from the oropharynx and anterior nares. *J Virol Methods*. 2020 Nov;285:113948.
24. Western Australian Department of Education. Public and non-government schools with full-time students (by metropolitan, country and combined) - Semester 2, 2020. *School Information - Statistical Reports*. 2020.
25. Mullane MJ, Thomas HM, Epstein M, Mandzufas J, Mullan N, Whelan A, et al. DETECT Schools Study Protocol: A Prospective Observational Cohort Surveillance Study Investigating the Impact of COVID-19 in Western Australian Schools. *Front Public Heal* [Internet]. 2021;9:16. Available from: <https://www.frontiersin.org/article/10.3389/fpubh.2021.636921>

- 1  
2  
3 26. Harris PA, Taylor R, Thielke R, Payne J, Gonzalez N, Conde JG. Research electronic data capture (REDCap)-A  
4 metadata-driven methodology and workflow process for providing translational research informatics support.  
5 J Biomed Inform [Internet]. 2009;42(2):377–81. Available from: <http://dx.doi.org/10.1016/j.jbi.2008.08.010>  
6  
7  
8  
9  
10 27. Corman VM, Landt O, Kaiser M, Molenkamp R, Meijer A, Chu DK, et al. Detection of 2019 novel coronavirus  
11 (2019-nCoV) by real-time RT-PCR. Euro Surveill Bull Eur sur les Mal Transm = Eur Commun Dis Bull. 2020  
12 Jan;25(3).  
13  
14  
15  
16  
17 28. Bai Y, Yao L, Wei T, Tian F, Jin D-Y, Chen L, et al. Presumed Asymptomatic Carrier Transmission of COVID-19.  
18 JAMA. 2020 Apr;323(14):1406–7.  
19  
20  
21  
22 29. Mizumoto K, Kagaya K, Zarebski A, Chowell G. Estimating the asymptomatic proportion of coronavirus disease  
23 2019 (COVID-19) cases on board the Diamond Princess cruise ship, Yokohama, Japan, 2020. Euro Surveill Bull  
24 Eur sur les Mal Transm = Eur Commun Dis Bull. 2020 Mar;25(10).  
25  
26  
27  
28  
29 30. Moghadas SM, Fitzpatrick MC, Sah P, Pandey A, Shoukat A, Singer BH, et al. The implications of silent  
30 transmission for the control of COVID-19 outbreaks. Proc Natl Acad Sci U S A. 2020 Jul;117(30):17513–5.  
31  
32  
33  
34 31. Moisset X, Gautier N, Godet T, Parabère S, Pereira B, Meunier E, et al. Nasopharyngeal swab-induced pain for  
35 SARS-CoV-2 screening: A randomised controlled trial of conventional and self-swabbing. Eur J Pain [Internet].  
36 n/a(n/a). Available from: <https://onlinelibrary.wiley.com/doi/abs/10.1002/ejp.1722>  
37  
38  
39  
40  
41  
42 32. Armitage R, Nellums LB. Considering inequalities in the school closure response to COVID-19. Vol. 8, The  
43 Lancet Global Health. 2020. p. e644.  
44  
45  
46  
47 33. Lee J. Mental health effects of school closures during COVID-19. Lancet Child Adolesc Heal [Internet]. 2020 Jun  
48 1;4(6):421. Available from: [https://doi.org/10.1016/S2352-4642\(20\)30109-7](https://doi.org/10.1016/S2352-4642(20)30109-7)  
49  
50  
51  
52 34. Jamal AJ, Mozafarihashjin M, Coomes E, Anceva-Sami S, Barati S, Crowl G, et al. Sensitivity of midturbinate  
53 versus nasopharyngeal swabs for the detection of severe acute respiratory syndrome coronavirus 2 (SARS-  
54  
55  
56  
57  
58  
59  
60

- 1  
2  
3 CoV-2). Infect Control Hosp Epidemiol. 2020 Nov;1–3.  
4  
5  
6 35. Garnett L, Bello A, Tran KN, Audet J, Leung A, Schiffman Z, et al. Comparison analysis of different swabs and  
7  
8 transport mediums suitable for SARS-CoV-2 testing following shortages. J Virol Methods. 2020  
9  
10 Nov;285:113947.  
11  
12  
13 36. Moore C, Corden S, Sinha J, Jones R. Dry cotton or flocked respiratory swabs as a simple collection technique  
14  
15 for the molecular detection of respiratory viruses using real-time NASBA. J Virol Methods. 2008  
16  
17 Nov;153(2):84–9.  
18  
19  
20  
21 37. Mina MJ, Andersen KG. COVID-19 testing: One size does not fit all. Science (80- ) [Internet].  
22  
23 2021;371(6525):126–7. Available from: <https://science.sciencemag.org/content/371/6525/126>  
24  
25  
26  
27  
28  
29  
30  
31  
32  
33  
34  
35  
36  
37  
38  
39  
40  
41  
42  
43  
44  
45  
46  
47  
48  
49  
50  
51  
52  
53  
54  
55  
56  
57  
58  
59  
60

## Figure legends

Figure 1. Geographic distribution of schools participating in DETECT Schools Study swabbing.

Figure 2. Distribution of survey responses regarding A) self-reported discomfort (student and staff); B) students' concern about being swabbed (self- and parent-reported); and C) students' concern regarding swabbing staff use of PPE.

For peer review only

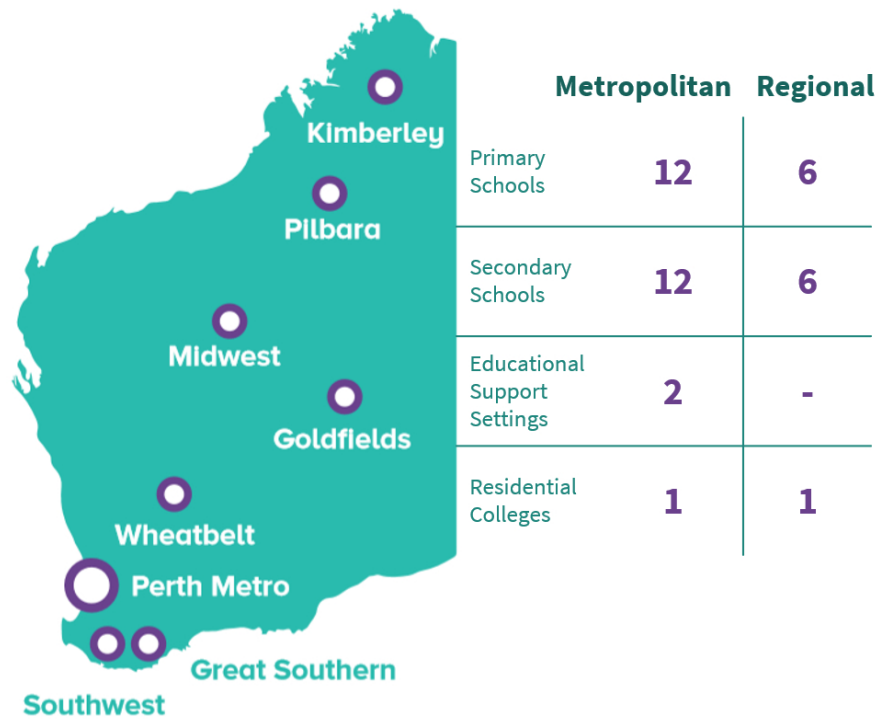

Figure 1. Geographic distribution of schools participating in DETECT Schools Study swabbing.

184x137mm (150 x 150 DPI)

1  
2  
3  
4  
5  
6  
7  
8  
9  
10  
11  
12  
13  
14  
15  
16  
17  
18  
19  
20  
21  
22  
23  
24  
25  
26  
27  
28  
29  
30  
31  
32  
33  
34  
35  
36  
37  
38  
39  
40  
41  
42  
43  
44  
45  
46  
47  
48  
49  
50  
51  
52  
53  
54  
55  
56  
57  
58  
59  
60

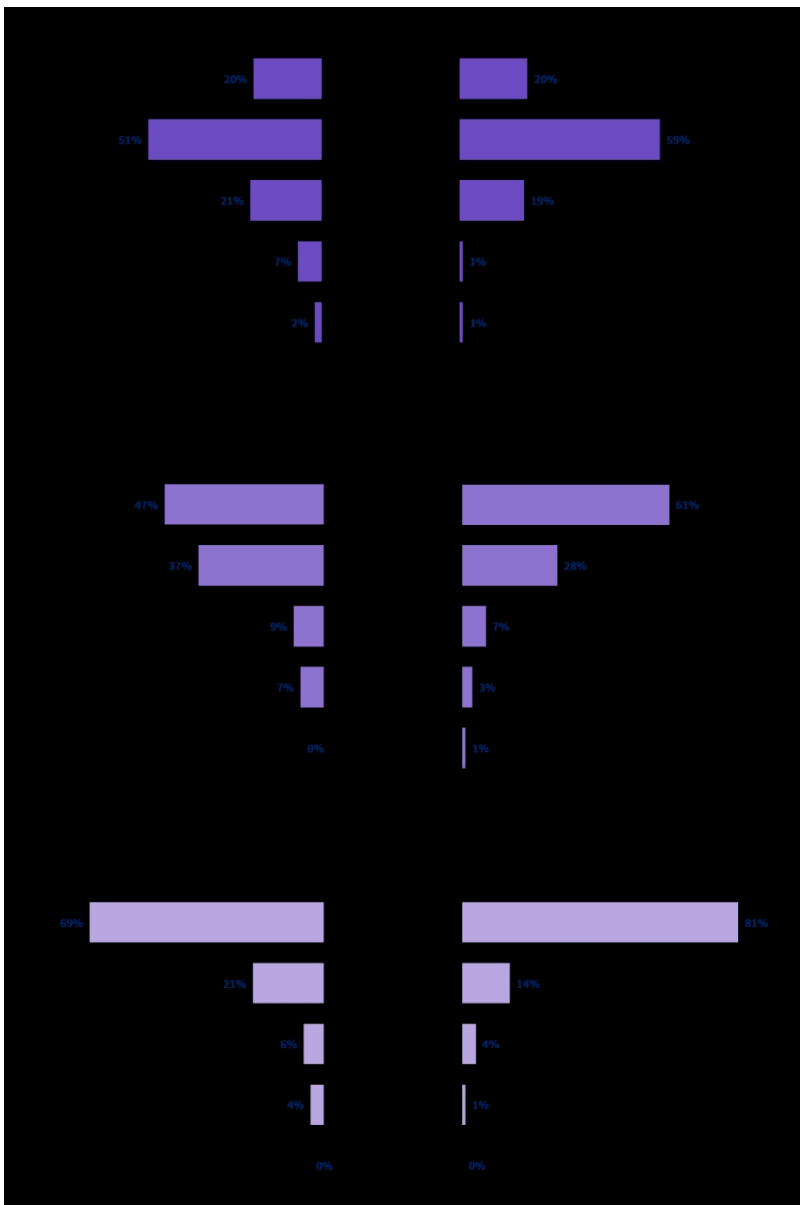

255x384mm (150 x 150 DPI)



1  
2  
3  
4  
5  
6  
7  
8  
9  
10  
11  
12  
13  
14  
15  
16  
17  
18  
19  
20  
21  
22  
23  
24  
25  
26  
27  
28  
29  
30  
31  
32  
33  
34  
35  
36  
37  
38  
39  
40  
41  
42  
43  
44  
45  
46  
47  
48  
49  
50  
51  
52  
53  
54  
55  
56  
57  
58  
59  
60

## STROBE Statement—checklist of items that should be included in reports of observational studies

|                           | Item No | Recommendation                                                                                                                                                                                                                                                                                                                                                                                                                                                         |                     | Page                    |
|---------------------------|---------|------------------------------------------------------------------------------------------------------------------------------------------------------------------------------------------------------------------------------------------------------------------------------------------------------------------------------------------------------------------------------------------------------------------------------------------------------------------------|---------------------|-------------------------|
| <b>Title and abstract</b> | 1       | (a) Indicate the study's design with a commonly used term in the title or the abstract                                                                                                                                                                                                                                                                                                                                                                                 | YES                 | 2                       |
|                           |         | (b) Provide in the abstract an informative and balanced summary of what was done and what was found                                                                                                                                                                                                                                                                                                                                                                    | YES                 | 2                       |
| <b>Introduction</b>       |         |                                                                                                                                                                                                                                                                                                                                                                                                                                                                        |                     |                         |
| Background/rationale      | 2       | Explain the scientific background and rationale for the investigation being reported                                                                                                                                                                                                                                                                                                                                                                                   | YES                 | 4                       |
| Objectives                | 3       | State specific objectives, including any prespecified hypotheses                                                                                                                                                                                                                                                                                                                                                                                                       | YES                 | 5                       |
| <b>Methods</b>            |         |                                                                                                                                                                                                                                                                                                                                                                                                                                                                        |                     |                         |
| Study design              | 4       | Present key elements of study design early in the paper                                                                                                                                                                                                                                                                                                                                                                                                                | YES                 | 5                       |
| Setting                   | 5       | Describe the setting, locations, and relevant dates, including periods of recruitment, exposure, follow-up, and data collection                                                                                                                                                                                                                                                                                                                                        | YES                 | 6                       |
| Participants              | 6       | (a) <i>Cohort study</i> —Give the eligibility criteria, and the sources and methods of selection of participants. Describe methods of follow-up<br><i>Case-control study</i> —Give the eligibility criteria, and the sources and methods of case ascertainment and control selection. Give the rationale for the choice of cases and controls<br><i>Cross-sectional study</i> —Give the eligibility criteria, and the sources and methods of selection of participants | YES                 | 5-6                     |
|                           |         | (b) <i>Cohort study</i> —For matched studies, give matching criteria and number of exposed and unexposed<br><i>Case-control study</i> —For matched studies, give matching criteria and the number of controls per case                                                                                                                                                                                                                                                 |                     |                         |
| Variables                 | 7       | Clearly define all outcomes, exposures, predictors, potential confounders, and effect modifiers. Give diagnostic criteria, if applicable                                                                                                                                                                                                                                                                                                                               | NA                  |                         |
| Data sources/measurement  | 8*      | For each variable of interest, give sources of data and details of methods of assessment (measurement). Describe comparability of assessment methods if there is more than one group                                                                                                                                                                                                                                                                                   | YES                 | 7                       |
| Bias                      | 9       | Describe any efforts to address potential sources of bias                                                                                                                                                                                                                                                                                                                                                                                                              | YES                 | 5                       |
| Study size                | 10      | Explain how the study size was arrived at                                                                                                                                                                                                                                                                                                                                                                                                                              | YES                 | (explained in protocol) |
| Quantitative variables    | 11      | Explain how quantitative variables were handled in the analyses. If applicable, describe which groupings were chosen and why                                                                                                                                                                                                                                                                                                                                           | YES                 | (explained in protocol) |
| Statistical methods       | 12      | (a) Describe all statistical methods, including those used to control for confounding                                                                                                                                                                                                                                                                                                                                                                                  | NA<br>(descriptive) |                         |

|                   |     |                                                                                                                                                                                                              |     |    |
|-------------------|-----|--------------------------------------------------------------------------------------------------------------------------------------------------------------------------------------------------------------|-----|----|
|                   |     | (b) Describe any methods used to examine subgroups and interactions                                                                                                                                          | NA  |    |
|                   |     | (c) Explain how missing data were addressed                                                                                                                                                                  | NA  |    |
|                   |     | (d) <i>Cohort study</i> —If applicable, explain how loss to follow-up was addressed                                                                                                                          | NA  |    |
|                   |     | <i>Case-control study</i> —If applicable, explain how matching of cases and controls was addressed                                                                                                           |     |    |
|                   |     | <i>Cross-sectional study</i> —If applicable, describe analytical methods taking account of sampling strategy                                                                                                 |     |    |
|                   |     | (e) Describe any sensitivity analyses                                                                                                                                                                        |     |    |
| <b>Results</b>    |     |                                                                                                                                                                                                              |     |    |
| Participants      | 13* | (a) Report numbers of individuals at each stage of study—eg numbers potentially eligible, examined for eligibility, confirmed eligible, included in the study, completing follow-up, and analysed            | YES | 8  |
|                   |     | (b) Give reasons for non-participation at each stage                                                                                                                                                         | NA  |    |
|                   |     | (c) Consider use of a flow diagram                                                                                                                                                                           |     |    |
| Descriptive data  | 14* | (a) Give characteristics of study participants (eg demographic, clinical, social) and information on exposures and potential confounders                                                                     | YES | 8  |
|                   |     | (b) Indicate number of participants with missing data for each variable of interest                                                                                                                          | YES | 8  |
|                   |     | (c) <i>Cohort study</i> —Summarise follow-up time (eg, average and total amount)                                                                                                                             | NA  |    |
| Outcome data      | 15* | <i>Cohort study</i> —Report numbers of outcome events or summary measures over time                                                                                                                          | NA  |    |
|                   |     | <i>Case-control study</i> —Report numbers in each exposure category, or summary measures of exposure                                                                                                         | NA  |    |
|                   |     | <i>Cross-sectional study</i> —Report numbers of outcome events or summary measures                                                                                                                           | NA  |    |
| Main results      | 16  | (a) Give unadjusted estimates and, if applicable, confounder-adjusted estimates and their precision (eg, 95% confidence interval). Make clear which confounders were adjusted for and why they were included | NA  |    |
|                   |     | (b) Report category boundaries when continuous variables were categorized                                                                                                                                    | NA  |    |
|                   |     | (c) If relevant, consider translating estimates of relative risk into absolute risk for a meaningful time period                                                                                             | NA  |    |
| Other analyses    | 17  | Report other analyses done—eg analyses of subgroups and interactions, and sensitivity analyses                                                                                                               | NA  |    |
| <b>Discussion</b> |     |                                                                                                                                                                                                              |     |    |
| Key results       | 18  | Summarise key results with reference to study objectives                                                                                                                                                     | YES | 9  |
| Limitations       | 19  | Discuss limitations of the study, taking into account sources of potential bias or imprecision. Discuss both direction and magnitude of any potential bias                                                   | YES | 11 |
| Interpretation    | 20  | Give a cautious overall interpretation of results considering objectives, limitations, multiplicity of analyses, results from similar studies, and other relevant evidence                                   | YES | 10 |
| Generalisability  | 21  | Discuss the generalisability (external validity) of the study results                                                                                                                                        | YES | 11 |

1  
2  
3  
4  
5  
6  
7  
8  
9  
10  
11  
12  
13  
14  
15  
16  
17  
18  
19  
20  
21  
22  
23  
24  
25  
26  
27  
28  
29  
30  
31  
32  
33  
34  
35  
36  
37  
38  
39  
40  
41  
42  
43  
44  
45  
46  
47  
48  
49  
50  
51  
52  
53  
54  
55  
56  
57  
58  
59  
60

### Other information

|         |    |                                                                                                                                                               |     |    |
|---------|----|---------------------------------------------------------------------------------------------------------------------------------------------------------------|-----|----|
| Funding | 22 | Give the source of funding and the role of the funders for the present study and, if applicable, for the original study on which the present article is based | YES | 12 |
|---------|----|---------------------------------------------------------------------------------------------------------------------------------------------------------------|-----|----|

\*Give information separately for cases and controls in case-control studies and, if applicable, for exposed and unexposed groups in cohort and cross-sectional studies.

**Note:** An Explanation and Elaboration article discusses each checklist item and gives methodological background and published examples of transparent reporting. The STROBE checklist is best used in conjunction with this article (freely available on the Web sites of PLoS Medicine at <http://www.plosmedicine.org/>, Annals of Internal Medicine at <http://www.annals.org/>, and Epidemiology at <http://www.epidem.com/>). Information on the STROBE Initiative is available at [www.strobe-statement.org](http://www.strobe-statement.org).

For peer review only

# BMJ Open

## Acceptability of OP/Na swabbing for SARS-CoV-2: A prospective observational cohort surveillance study in Western Australian schools

|                                 |                                                                                                                                                                                                                                                                                                                                                                                                                                                                                                                                                                                                                                                                                                                                                                                                                                                                                                                                                                                                                                                                                                                                                                                                                                                                                                                                                                                                                                     |
|---------------------------------|-------------------------------------------------------------------------------------------------------------------------------------------------------------------------------------------------------------------------------------------------------------------------------------------------------------------------------------------------------------------------------------------------------------------------------------------------------------------------------------------------------------------------------------------------------------------------------------------------------------------------------------------------------------------------------------------------------------------------------------------------------------------------------------------------------------------------------------------------------------------------------------------------------------------------------------------------------------------------------------------------------------------------------------------------------------------------------------------------------------------------------------------------------------------------------------------------------------------------------------------------------------------------------------------------------------------------------------------------------------------------------------------------------------------------------------|
| Journal:                        | <i>BMJ Open</i>                                                                                                                                                                                                                                                                                                                                                                                                                                                                                                                                                                                                                                                                                                                                                                                                                                                                                                                                                                                                                                                                                                                                                                                                                                                                                                                                                                                                                     |
| Manuscript ID                   | bmjopen-2021-055217.R1                                                                                                                                                                                                                                                                                                                                                                                                                                                                                                                                                                                                                                                                                                                                                                                                                                                                                                                                                                                                                                                                                                                                                                                                                                                                                                                                                                                                              |
| Article Type:                   | Original research                                                                                                                                                                                                                                                                                                                                                                                                                                                                                                                                                                                                                                                                                                                                                                                                                                                                                                                                                                                                                                                                                                                                                                                                                                                                                                                                                                                                                   |
| Date Submitted by the Author:   | 06-Oct-2021                                                                                                                                                                                                                                                                                                                                                                                                                                                                                                                                                                                                                                                                                                                                                                                                                                                                                                                                                                                                                                                                                                                                                                                                                                                                                                                                                                                                                         |
| Complete List of Authors:       | Thomas, Hannah; Telethon Kids Institute; Telethon Kids Institute, Wesfarmers Centre of Vaccines & Infectious Diseases<br>Mullane, Marianne; Telethon Kids Institute; Telethon Kids Institute, Wesfarmers Centre of Vaccines & Infectious Diseases<br>Ang, Sherlynn; Telethon Kids Institute<br>Barrow, Tina; Telethon Kids Institute<br>Leahy, Adele ; Telethon Kids Institute; Telethon Kids Institute, Wesfarmers Centre of Vaccines & Infectious Diseases<br>Whelan, Alexandra; Telethon Kids Institute; Telethon Kids Institute, Wesfarmers Centre of Vaccines & Infectious Diseases<br>Lombardi, Karen; Telethon Kids Institute; Edith Cowan University<br>Cooper, Matthew; Telethon Kids Institute<br>Stevenson, Paul; Telethon Kids Institute<br>Lester, Leanne; University of Western Australia<br>Padley, Andrea; Child and Adolescent Health Service<br>Sprigg, Lynn; Child and Adolescent Health Service<br>Speers, David; University of Western Australia; PathWest Laboratory Medicine Western Australia<br>Merritt, A; PathWest Laboratory Medicine Western Australia<br>Coffin, Juli; Telethon Kids Institute; University of Western Australia<br>Cross, Donna; Telethon Kids Institute; University of Western Australia<br>Gething, Peter; Telethon Kids Institute; Curtin University<br>Bowen, Asha; Telethon Kids Institute, Wesfarmers Centre of Vaccines & Infectious Diseases; University of Western Australia |
| <b>Primary Subject Heading</b>: | Public health                                                                                                                                                                                                                                                                                                                                                                                                                                                                                                                                                                                                                                                                                                                                                                                                                                                                                                                                                                                                                                                                                                                                                                                                                                                                                                                                                                                                                       |
| Secondary Subject Heading:      | Infectious diseases                                                                                                                                                                                                                                                                                                                                                                                                                                                                                                                                                                                                                                                                                                                                                                                                                                                                                                                                                                                                                                                                                                                                                                                                                                                                                                                                                                                                                 |
| Keywords:                       | COVID-19, Diagnostic microbiology < INFECTIOUS DISEASES, Public health < INFECTIOUS DISEASES                                                                                                                                                                                                                                                                                                                                                                                                                                                                                                                                                                                                                                                                                                                                                                                                                                                                                                                                                                                                                                                                                                                                                                                                                                                                                                                                        |
|                                 |                                                                                                                                                                                                                                                                                                                                                                                                                                                                                                                                                                                                                                                                                                                                                                                                                                                                                                                                                                                                                                                                                                                                                                                                                                                                                                                                                                                                                                     |

SCHOLARONE™  
Manuscripts

1  
2  
3  
4  
5  
6  
7  
8  
9  
10  
11  
12  
13  
14  
15  
16  
17  
18  
19  
20  
21  
22  
23  
24  
25  
26  
27  
28  
29  
30  
31  
32  
33  
34  
35  
36  
37  
38  
39  
40  
41  
42  
43  
44  
45  
46  
47  
48  
49  
50  
51  
52  
53  
54  
55  
56  
57  
58  
59  
60

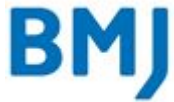

I, the Submitting Author has the right to grant and does grant on behalf of all authors of the Work (as defined in the below author licence), an exclusive licence and/or a non-exclusive licence for contributions from authors who are: i) UK Crown employees; ii) where BMJ has agreed a CC-BY licence shall apply, and/or iii) in accordance with the terms applicable for US Federal Government officers or employees acting as part of their official duties; on a worldwide, perpetual, irrevocable, royalty-free basis to BMJ Publishing Group Ltd ("BMJ") its licensees and where the relevant Journal is co-owned by BMJ to the co-owners of the Journal, to publish the Work in this journal and any other BMJ products and to exploit all rights, as set out in our [licence](#).

The Submitting Author accepts and understands that any supply made under these terms is made by BMJ to the Submitting Author unless you are acting as an employee on behalf of your employer or a postgraduate student of an affiliated institution which is paying any applicable article publishing charge ("APC") for Open Access articles. Where the Submitting Author wishes to make the Work available on an Open Access basis (and intends to pay the relevant APC), the terms of reuse of such Open Access shall be governed by a Creative Commons licence – details of these licences and which [Creative Commons](#) licence will apply to this Work are set out in our licence referred to above.

Other than as permitted in any relevant BMJ Author's Self Archiving Policies, I confirm this Work has not been accepted for publication elsewhere, is not being considered for publication elsewhere and does not duplicate material already published. I confirm all authors consent to publication of this Work and authorise the granting of this licence.

# Acceptability of OP/Na swabbing for SARS-CoV-2: A prospective observational cohort surveillance study in Western Australian schools

Thomas H M<sup>1,2</sup>, Mullane M<sup>1,2</sup>, Ang S<sup>1</sup>, Barrow T<sup>1</sup>, Leahy A<sup>1,2</sup>, Whelan A<sup>1,2</sup>, Lombardi K<sup>1,3</sup>, Cooper M<sup>1</sup>, Stevenson P G<sup>1</sup>, Lester L<sup>4</sup>, Padley A<sup>5</sup>, Sprigg L<sup>5</sup>, Speers D J<sup>4,6</sup>, Merritt A J<sup>6</sup>, Coffin J<sup>1,4</sup>, Cross D<sup>1,4</sup>, Gething P<sup>1,7</sup>, Bowen A C<sup>1,2,4,5</sup>

<sup>1</sup>Telethon Kids Institute, Perth, Western Australia, Australia

<sup>2</sup>Wesfarmers Centre of Vaccines & Infectious Diseases, Telethon Kids Institute, Perth, Western Australia, Australia

<sup>3</sup>Edith Cowan University, Perth, Western Australia, Australia

<sup>4</sup>University of Western Australia, Perth, Western Australia, Australia

<sup>5</sup>Child and Adolescent Health Service, Perth, Western Australia, Australia

<sup>6</sup>Pathwest Laboratory Medicine Western Australia, Perth, Western Australia, Australia

<sup>7</sup>Curtin University, Perth, Western Australia, Australia

## Corresponding author:

Hannah M Thomas

Hannah.thomas@telethonkids.org.au

+614 31 971 803

## Key words:

SARS-CoV-2, swabbing, discomfort, screening, COVID-19

## Word count:

2,416

## Abstract

**Objectives:** When the COVID-19 pandemic was declared, Governments responded with lockdown and isolation measures to combat viral spread, including the closure of many schools. More than a year later, widespread screening for SARS-CoV-2 is critical to allow schools and other institutions to remain open. Here we describe the acceptability of a minimally-invasive COVID-19 screening protocol trialled by the Western Australian (WA) Government to mitigate the risks of and boost public confidence in schools remaining open. To minimise discomfort, and optimise recruitment and tolerability in unaccompanied children, a combined throat and nasal (OP/Na) swab was chosen over the nasopharyngeal swab commonly used, despite slightly reduced test performance.

**Design, setting and participants:** Trialling of OP/Na swabbing took place as part of a prospective observational cohort surveillance study in 79 schools across Western Australia. Swabs were collected from 5,903 asymptomatic students and 1,036 asymptomatic staff in 40 schools monthly between June and September 2020.

**Outcome measures:** PCR testing was performed with a two-step diagnostic and independent confirmatory PCR for any diagnostic PCR positives. Concurrent surveys, collected online through the REDCap platform, evaluated participant experiences of in-school swabbing.

**Results:** 13,988 swabs were collected from students and staff. There were zero positive test results for SARS-CoV-2, including no false positives. Participants reported high acceptability: 71% of students reported no or minimal discomfort and most were willing to be re-swabbed (4% refusal rate).

**Conclusions:** OP/Na swabbing is acceptable and repeatable in schoolchildren as young as 4 years old and may combat noncompliance rates by significantly increasing the acceptability of testing. This kind of



1  
2  
3  
4  
5  
6  
7  
8  
9  
10  
11  
12  
13  
14  
15  
16  
17  
18  
19  
20  
21  
22  
23  
24  
25  
26  
27  
28  
29  
30  
31  
32  
33  
34  
35  
36  
37  
38  
39  
40  
41  
42  
43  
44  
45  
46  
47  
48  
49  
50  
51  
52  
53  
54  
55  
56  
57  
58  
59  
60

minimally-invasive testing will be key to the success of ongoing, voluntary mass screening as society adjusts to a new 'normal' in the face of COVID-19.

**Trial registration:** Australian New Zealand Clinical Trials Registry - ACTRN12620000922976

For peer review only

## Article Summary

### Strengths:

- Participation of 40 Western Australian schools, with broad representation across geography, socioeconomic demographics and school type.
- Minimally invasive SARS-CoV-2 swabbing method, likely to enhance rates of active consent and participation in COVID-19 screening.

### Limitations:

- The sample size of this study is dictated by pragmatic, budgetary and logistical considerations.
- School selection was purposeful, not random, to ensure inclusion of a diverse sample.

## Introduction

In late 2019 the SARS-CoV-2 virus emerged, and shortly thereafter, a global pandemic was declared (1). Governments responded with lockdown and isolation measures to combat the spread of COVID-19, including the closure of many schools (2). Quickly, it became clear that building capacity to test for COVID-19 rapidly and accurately would be critical for public safety and confidence in the reopening of schools. Here, we describe the results of the DETECT Schools Study, launched in Western Australia (WA), Australia, to trial a minimally invasive method for asymptomatic SARS-CoV-2 virus screening in primary and secondary schools across the state where children were swabbed unaccompanied by parents or caregivers.

The mandate of the DETECT Schools Study was simple: to screen asymptomatic students and staff swiftly and effectively for SARS-CoV-2 without causing discomfort. This speaks to a broader global need for transformative approaches to SARS-CoV-2 testing, as screening for the new virus becomes a part of daily life. As society grapples with a new 'normal', individuals with respiratory symptoms, those working in high-risk environments and those returning from travel are being swabbed regularly for SARS-CoV-2 in an effort to protect their communities.

At the onset of the COVID-19 pandemic, nasopharyngeal (NP) swabbing for polymerase chain reaction (PCR) detection of SARS-CoV-2 was rapidly adopted globally as the gold standard for COVID-19 diagnosis (3), however the validation of less invasive methods for virus detection is necessary to optimise compliance and increase the reach of mass screening programs moving forwards.

At the time of this study, antigen tests were not yet available. Saliva sample PCR testing had emerged as a practical and non-invasive sampling method for the detection of SARS-CoV-2 in symptomatic (4) and asymptomatic people (5), but there are conflicting studies concerning sensitivity, with some reporting similar detection rates to NP swabbing (6–8) while others indicate low sensitivity (9) and caution against reliance on saliva samples alone for SARS-CoV-2 screening (10). Similarly, oropharyngeal (OP) swabbing is supported by some studies (11) but displays inferior performance to NP

1  
2  
3 swabbing in others (12). Nasal (Na) swabs offer another minimally invasive alternative with reasonable sensitivity  
4 (13,14), which are found to be more sensitive than throat swabs for SARS-CoV-2 detection in children (15) and are  
5  
6  
7 suited to high volume screening with a confirmatory NP swab. However, nasal swabs collected late in the disease course  
8  
9  
10 are less sensitive than NP samples (16), and modelling suggests that this sampling technique in isolation does not  
11  
12 effectively capture patients with a low viral load (17).  
13  
14

15 Nasal swabbing has previously been found to be more comfortable and only marginally less sensitive than NP sampling  
16  
17 for the detection of influenza (18). Pairing a nasal swab with an OP swab offers a minimally invasive method for SARS-  
18  
19 CoV-2 detection, with studies indicating specificity equivalent to and sensitivity marginally reduced (~3%) from that of  
20  
21 NP swabbing (19–21). This sensitivity is reportedly retained when allowing self-collection (22) or varying the swab type  
22  
23 used (23). Harnessing the sensitivity of both sampling techniques may maximise the chances of viral detection while  
24  
25 remaining minimally invasive. So, does the use of OP/Na swabbing minimise discomfort enough to justify this small  
26  
27 sacrifice in sensitivity? Here we report the use of OP/Na swabbing to rapidly screen for SARS-CoV-2 in a large school-  
28  
29 based cohort of volunteers, with an aim to optimise comfort and acceptability without losing sensitivity and specificity.  
30  
31  
32  
33

## 34 **Methods**

35  
36  
37

38 The state of WA is vast, covering one third the landmass of Australia. The population is concentrated in the capital city  
39  
40 of Perth (2.1 million), with the remaining 400,000 people spread across the State's 2.6 million square kilometres. There  
41  
42 are 1,131 schools across the state: 818 of these are public (Government) schools, at which a total of 315,148 students  
43  
44 were enrolled in 2020 (24).  
45  
46

47 The study protocol is published (25). Briefly, 40 public schools (28,331 enrolled students and 4,023 employed staff)  
48  
49 were purposefully selected by the WA Department of Education for participation in the study, ensuring representative  
50  
51 inclusion of education support schools, residential colleges, and regional schools. Students aged 4 – 18 years were  
52  
53 eligible, with two-thirds at metropolitan schools and one-third at regional schools from across the state (Figure 1).  
54  
55  
56  
57  
58  
59  
60

1  
2  
3 Prior to study commencement, written and video study and consent information was distributed by the schools to staff  
4 and parents, including study information and consent forms developed in consultation with a consumer advisory group  
5 and the Telethon Kids Institute Kulunga Aboriginal Research Development Unit. Staff and parents provided active  
6 informed consent through an online portal supported by the REDCap platform (26). Randomly selected consenting  
7 participants (n=150; 90% students, 10% staff) were swabbed at each school in each round unless the school was not  
8 large enough to facilitate, in which case as many participants as possible were swabbed. Consented participants could  
9 subsequently refuse swabbing or withdraw from the study at any time.

10 SARS-CoV-2 swabbing of consented students and staff was carried out in the schools over three rounds between June  
11 and September 2020. We employed a combined oropharyngeal and nasal flocked swab (OP/Na) (22, 23). During study  
12 development, swab comfort was investigated with a group of paediatric volunteers: the CITOSWAB flocked swab (Gaia  
13 Science, Singapore) was selected as the preferred swab for OP/Na sampling.

14  
15  
16  
17  
18  
19  
20  
21  
22  
23  
24  
25  
26  
27  
28  
29 Nurses received training in personal protective equipment (masks, gowns, eyewear and gloves) donning and doffing  
30 and swabbing technique before commencing the swabbing study in schools. Using a side-to-side motion, the swab was  
31 first swept across the back of the pharynx at least once in each direction, including both tonsils. The same swab was  
32 then inserted into one nostril (chosen by the child) along the floor of the nasal cavity parallel to the palate until  
33 resistance was encountered, rotated gently five times, withdrawn, and placed in the sheath containing viral transport  
34 medium (CITOSWAB, Gaia Science, Singapore). Swabs were transported to the WA public laboratory service provider  
35 in Perth, WA, and tested for SARS-CoV-2 using an in-house PCR platform modified from the WHO recommended assay  
36 (27) to include an inhibitor control, which detects the pan-sarbecovirus E gene. Validation studies of the PCR were  
37 performed early in the pandemic and confirmed a high analytical sensitivity and specificity with appropriate positive  
38 and negative controls. Any swab returning an in-house PCR positive result (CT value < 45) was subject to confirmatory  
39 testing with the Xpert Xpress SARS-CoV-2 assay (Cepheid, California, USA). In-house and confirmatory PCR detections  
40 were reported as positive.

1  
2  
3 Surveys were administered to a subset of swabbing participants in the two weeks following the first round of swabbing  
4  
5 in each school, and again a month after the completion of all swabbing rounds. Surveys asked about participant  
6  
7 experiences of swabbing, including the level of discomfort, concern and disruption associated with in-school testing.  
8  
9 Parents were also surveyed about their child's swabbing experience. The surveys were administered during school  
10  
11 classes for students and through personal email for staff and parents. Complete survey tools have been published  
12  
13 previously (25).  
14  
15

### 16 17 **Patient and public involvement**

18  
19 Community involvement and advice was actively sought in the design and preparation of this study. Procedures and  
20  
21 resources were reviewed and approved by a National Community Advisory Group for COVID-19 Research, convened  
22  
23 by the Telethon Kids Institute and comprising community members from across Australia, including Aboriginal  
24  
25 members. The Telethon Kids Institute Kulunga Aboriginal Research Development Unit consulted on study resource  
26  
27 development, including culturally-secure and informed consent processes and measures to supporting Aboriginal  
28  
29 families.  
30  
31  
32  
33

### 34 **Ethics approval statement**

35  
36 Ethical approval was obtained from the WA Child and Adolescent Health Service (PRN RGS0000004059) and the WA  
37  
38 Aboriginal Health Ethics Committee (PRN 993).  
39  
40  
41  
42  
43  
44  
45  
46  
47  
48  
49  
50  
51  
52  
53  
54  
55  
56  
57  
58  
59  
60

## Results

1,458 school staff members and the parents of 7,386 students engaged with the online consent platform. 7,281 of these students (98.6%) and 1,321 staff (90.6%) consented to be swabbed. Over the three rounds, 13,988 swabs were collected from 5,903 students and 1,036 staff (Table 1).

Table 1. Demographics of school students and staff participating in swabbing.

|                                                 |                | Students      | Staff         |
|-------------------------------------------------|----------------|---------------|---------------|
| <b>Total participants</b>                       |                | 5,903         | 1,036         |
| <b>Gender</b>                                   | Female         | 2,636 (44.7%) | 563 (54.3%)   |
|                                                 | Male           | 3,255 (55.1%) | 473 (45.7%)   |
|                                                 | Other          | 12 (0.2%)     | 0 (0%)        |
| <b>Aboriginal and/or Torres Strait Islander</b> | Yes            | 328 (5.6%)    | 11 (1.1%)     |
|                                                 | No             | 5,006 (84.8%) | 1,022 (98.6%) |
|                                                 | Not identified | 569 (9.6%)    | 3 (0.3%)      |
| <b>Area</b>                                     | Metropolitan   | 4,479 (75.9%) | 812 (78.4%)   |
|                                                 | Regional       | 1,424 (24.1%) | 224 (21.6%)   |
| <b>Median age (years)</b>                       |                | 12            | 48            |

Swabs were collected from across the state, and results provided by text message to all participating families and staff within 72 hours of sample collection. All but one sample returned negative results on the in-house PCR platform, and confirmatory Xpert testing of the in-house PCR detection returned a negative result. As such, none of the 13,988

1  
2  
3 samples collected were positive for SARS-CoV-2. This was consistent with no cases of local SARS-CoV-2 transmission  
4  
5 reported in WA throughout the study period.  
6  
7

8 5,349 students and 911 staff were randomised to be swabbed more than once across the three rounds. Of these  
9  
10 participants, 214 students (4%) and 12 staff (1.3%) declined to be swabbed again (declined on the day or withdrew  
11  
12 from the study).  
13  
14

15 After the first round of swabbing, the majority of student respondents indicated on a five-point scale (none, mild,  
16  
17 moderate, painful, very painful) no more than mild discomfort (no discomfort: 19.7%; mild discomfort: 51.0%) (Figure  
18  
19 2A). Most of the remaining students reported moderate discomfort (20.5%), with few indicating that the swabbing was  
20  
21 painful (painful: 6.5%; very painful: 2.3%). The majority of staff who had been swabbed also indicated only mild (59.4%)  
22  
23 or no (19.6%) discomfort during the procedure.  
24  
25  
26  
27  
28

29 Most students reported feeling only a little (37.2%) or not at all (47.3%) concerned about participating in testing (Figure  
30  
31 2B). The parents of participating students also reported on their child's levels of concern, with the majority of parents  
32  
33 observing little (28.4%) or no (60.8%) concern in their children.  
34  
35  
36  
37

38 Participating students were also asked whether they had been concerned about swabbing nurses wearing PPE at their  
39  
40 school. For the most part, students reported only a little or no concern about this. Primary school students were slightly  
41  
42 more likely to be at least moderately concerned (10%) than secondary students (5%) (Figure 2C).  
43  
44  
45  
46

47 After three rounds of swabbing, surveys were administered again to an unmatched subset of swabbing participants.  
48  
49 Response distributions were comparable to those described for the first survey cycle, with the majority of those  
50  
51 surveyed still indicating mild levels of discomfort and concern after ongoing testing.  
52  
53  
54  
55  
56  
57  
58  
59  
60



## Discussion

Efficient, accurate SARS-CoV-2 screening will be key to ameliorating the progression of the COVID-19 pandemic. As epidemiological evidence suggests that asymptomatic and pre-symptomatic individuals play a significant role in propagating the transmission of the virus (28–30), in low prevalence settings like WA the screening of asymptomatic populations will continue to be important to prevent a rise in cases. Without the indication of symptoms, this mode of screening requires good will and voluntary participation and must therefore strike a balance between optimising both testing sensitivity and participant comfort. As the discomfort associated with nasopharyngeal SARS-CoV-2 swabbing techniques risks poor adherence to mass screening campaigns (31), alternative approaches will be necessary to cultivate the consistency and reliability of public swabbing adherence necessary moving forwards.

For school-aged children, closing schools to combat the spread of COVID-19 must be balanced against the very real challenges in mental health and inequality likely associated with missing out on the educational and social benefits of school attendance (32,33). Consequently, countries around the world have mobilised to implement mass testing in an effort to support the reopening of schools and other establishments. COVID-19 molecular surveillance will be important moving forwards to ensure the safety of schools and individuals, especially in high prevalence countries in which cases continue to climb. Refinement of a robust and well-accepted screening mechanism is required to support the continuation of education; however very little data has been available on the acceptability of various swabbing procedures and how this may impact adherence to screening programs.

Through the DETECT Schools Study we have evaluated the acceptability of OP/Na sampling, reported to facilitate SARS-CoV-2 detection with limited or no sacrifice in sensitivity compared to the standard NP procedure (18,34), in a school setting. Sampling was conducted with a flocked nylon swab: while evidence suggests that cotton, synthetic, flocked, and non-flocked swabs all exhibit comparable performance for SARS-CoV-2 detection (35), flocked swabs have previously been shown to deliver a higher yield when swabbing for other respiratory viruses (36).

1  
2  
3 In a large, representative cohort of school students and staff, our findings indicate that the vast majority of participants  
4 experienced minimal or no discomfort during an OP/Na swab. Almost all of those who were asked to participate a  
5 second time agreed, illustrating the high tolerance for repeat procedures which is desirable for optimised respiratory  
6 screening programs. This also suggests that individuals may be open to completing self-collected sampling, which has  
7 been shown to deliver adequate sensitivity for SARS-CoV-2 detection (37). Decreased discomfort is also likely to be  
8 associated with a reduced possibility of coughing, gagging or sneezing during sampling, in turn decreasing the risk of  
9 viral exposure for healthcare staff. While potentially not acceptable in specific settings with vulnerable groups for which  
10 sensitivity is paramount, such as entry screening for nursing homes (38), we argue that in schools and other similar  
11 settings this small decrease in sensitivity is far outweighed by high rates of consent and compliance which will allow for  
12 widespread testing.  
13  
14  
15  
16  
17  
18  
19  
20  
21  
22  
23  
24  
25

26 This study was part of Western Australia's jurisdictional response to the COVID-19 pandemic in April 2020. At the time  
27 of design, the state had been in a complete lockdown for five weeks, and schools were closed. The study was designed  
28 and implemented to reassure families and the public that schools could re-open, and to inform the level of risk of  
29 transmission in a school setting. However, during this period of time, transmission of SARS-CoV-2 was so well controlled  
30 with public health measures that there were no detected community cases of COVID-19 for almost 10 months and as  
31 such there were also no confirmed cases in the study. Whilst this could be considered a methodological limitation, we  
32 have demonstrated the acceptability and ease of implementing a molecular based swabbing program in a school  
33 context with minimal disruption to students or educational outcomes.  
34  
35  
36  
37  
38  
39  
40  
41  
42  
43  
44

## 45 Conclusion

46  
47  
48  
49 Here we report an approach to large-scale asymptomatic swabbing for SARS-CoV-2 leading to high levels of willingness  
50 to participate. The sensitivity of this method for the identification of SARS-CoV-2 is supported by other studies. This  
51 methodology for screening children was well received by a large cohort and could be utilised to screen for  
52  
53  
54  
55  
56  
57  
58  
59  
60

1  
2  
3  
4  
5  
6  
7  
8  
9  
10  
11  
12  
13  
14  
15  
16  
17  
18  
19  
20  
21  
22  
23  
24  
25  
26  
27  
28  
29  
30  
31  
32  
33  
34  
35  
36  
37  
38  
39  
40  
41  
42  
43  
44  
45  
46  
47  
48  
49  
50  
51  
52  
53  
54  
55  
56  
57  
58  
59  
60

asymptomatic SARS-CoV-2 in other settings, mitigating the requirements for uncomfortable NP sampling and leading to enhanced compliance with programs designed to prevent onwards transmission of SARS-CoV-2.

For peer review only

## Funding

This work was supported by the Western Australian Department of Health [DoH20205875].

Donna Cross' contribution to this paper was supported by a National Health and Medical Research Council Research Fellowship [GNT1119339].

Asha Bowen receives an Investigator Award from the National Health and Medical Research Council of Australia [GNT1175509].

Peter Gething's contribution to this paper was supported by Channel 7 Telethon Trust, Western Australia.

## Data availability statement

DETECT Schools Study deidentified participant data is shared with study partners (WA Departments of Health and Education) but is not available to the public. The study protocol is published at <https://doi.org/10.3389/fpubh.2021.636921>.

## Acknowledgements

We would like to acknowledge and thank staff from PathWest, the WA Child and Adolescent Health Service and the WA Country Health Service for their valuable contribution to the DETECT Schools Study. We also thanks all students and staff who participated in swabbing.

## Author contributions

Hannah Thomas (HT) coordinated data collection, contributed to data analysis, conducted the literature search, generated figures and drafted the manuscript.

1  
2  
3 Marianne Mullane (MM) coordinated the conception and design of the study, coordinated data collection and  
4  
5 provided critical revision of drafts.  
6  
7

8 Sherlynn Ang (SA), Tina Barrow (TB), Adele Leahy (AL), Alex Whelan (AW) coordinated data collection and provided  
9  
10 critical revision of drafts.  
11  
12

13 Karen Lombardi (KL) coordinated and provided critical revision of drafts.  
14  
15

16 Matthew Cooper (MC), Paul Stevenson (PS), Leanne Lester (LL) and David Speers (DS) contributed to data analysis and  
17  
18 provided critical revision of drafts.  
19  
20

21 Adam Merritt (AM) contributed to design of test workflow, data analysis and provided critical revision of drafts.  
22  
23

24 Andrea Padley (AP) and Lyn Sprigg (LS) contributed to data collection and provided critical revision of drafts.  
25  
26

27 Juli Coffin (JC), Donna Cross (DC), Peter Gething (PG) and Asha Bowen (AB) oversaw conception, design and  
28  
29 coordination of the study and provided critical revision of drafts.  
30  
31

## 32 **Competing interests**

33  
34  
35  
36

37 Telethon Kids Institute authors report grants from the Western Australian Department of Health during the conduct  
38  
39 of this study.  
40  
41

42 Donna Cross and Asha Bowen report grants from the Western Australian Department of Health outside the  
43  
44 submitted work.  
45  
46

47 Asha Bowen, Andrea Padley, Lyn Sprigg, David Speers and Adam Merritt are employees of the Western Australian  
48  
49 Department of Health.  
50  
51  
52  
53  
54  
55  
56  
57  
58  
59  
60

## References

1. Du Toit A. Outbreak of a novel coronavirus. *Nat Rev*. 2020;18(1):123.
2. Viner RM, Russell SJ, Croker H, Packer J, Ward J, Stansfield C, et al. School closure and management practices during coronavirus outbreaks including COVID-19: a rapid systematic review. *Lancet Child Adolesc Heal*. 2020;4(5):397–404.
3. World Health Organisation. Laboratory testing for coronavirus disease 2019 (COVID-19) in suspected human cases: interim guidance. 2020.
4. Azzi L, Carcano G, Gianfagna F, Grossi P, Gasperina DD, Genoni A, et al. Saliva is a reliable tool to detect SARS-CoV-2. *J Infect*. 2020 Jul;81(1):e45–50.
5. Yokota I, Shane PY, Okada K, Unoki Y, Yang Y, Inao T, et al. Mass screening of asymptomatic persons for SARS-CoV-2 using saliva. *Clin Infect Dis an Off Publ Infect Dis Soc Am*. 2020 Sep;
6. Vaz SN, Santana DS de, Netto EM, Pedroso C, Wang W-K, Santos FDA, et al. Saliva is a reliable, non-invasive specimen for SARS-CoV-2 detection. *Brazilian J Infect Dis an Off Publ Brazilian Soc Infect Dis*. 2020 Aug;
7. To KK-W, Tsang OT-Y, Yip CC-Y, Chan K-H, Wu T-C, Chan JM-C, et al. Consistent Detection of 2019 Novel Coronavirus in Saliva. *Clin Infect Dis an Off Publ Infect Dis Soc Am*. 2020 Jul;71(15):841–3.
8. Chen JH-K, Yip CC-Y, Poon RW-S, Chan K-H, Cheng VC-C, Hung IF-N, et al. Evaluating the use of posterior oropharyngeal saliva in a point-of-care assay for the detection of SARS-CoV-2. *Emerg Microbes Infect*. 2020 Dec;9(1):1356–9.
9. Lin C, Xiang J, Yan M, Li H, Huang S, Shen C. Comparison of throat swabs and sputum specimens for viral nucleic acid detection in 52 cases of novel coronavirus (SARS-Cov-2)-infected pneumonia (COVID-19). *Clin Chem Lab Med*. 2020 Jun;58(7):1089–94.

10. Riccò M, Ranzieri S, Peruzzi S, Valente M, Marchesi F, Balzarini F, et al. RT-qPCR assays based on saliva rather than on nasopharyngeal swabs are possible but should be interpreted with caution: results from a systematic review and meta-analysis. *Acta Biomed.* 2020 Sep;91(3):e2020025.
11. Calame A, Mazza L, Renzoni A, Kaiser L, Schibler M. Sensitivity of nasopharyngeal, oropharyngeal, and nasal wash specimens for SARS-CoV-2 detection in the setting of sampling device shortage. *European Journal of Clinical Microbiology & Infectious Diseases.* 2020. p. 1–5.
12. Wang X, Tan L, Wang X, Liu W, Lu Y, Cheng L, et al. Comparison of nasopharyngeal and oropharyngeal swabs for SARS-CoV-2 detection in 353 patients received tests with both specimens simultaneously. *Int J Infect Dis IJID Off Publ Int Soc Infect Dis.* 2020 May;94:107–9.
13. Tu Y-P, Jennings R, Hart B, Cangelosi GA, Wood RC, Wehber K, et al. Swabs Collected by Patients or Health Care Workers for SARS-CoV-2 Testing. Vol. 383, *The New England journal of medicine.* 2020. p. 494–6.
14. McCulloch DJ, Kim AE, Wilcox NC, Logue JK, Greninger AL, Englund JA, et al. Comparison of Unsupervised Home Self-collected Midnasal Swabs With Clinician-Collected Nasopharyngeal Swabs for Detection of SARS-CoV-2 Infection. *JAMA Netw open.* 2020 Jul;3(7):e2016382.
15. Palmas G, Moriondo M, Trapani S, Ricci S, Calistri E, Pisano L, et al. Nasal swab as preferred clinical specimen for COVID-19 testing in children. *Pediatr Infect Dis J.* 2020;39(9):267–70.
16. Pinninti S, Trieu C, Pati SK, Latting M, Cooper J, Seleme MC, et al. Comparing Nasopharyngeal and Midturbinate Nasal Swab Testing for the Identification of Severe Acute Respiratory Syndrome Coronavirus 2. *Clin Infect Dis.* 2020;72(7):1253–5.
17. Callahan C, Lee R, Lee G, Zulauf KE, Kirby JE, Arnaout R. Nasal-Swab Testing Misses Patients with Low SARS-CoV-2 Viral Loads. *medRxiv : the preprint server for health sciences.* 2020.
18. Frazee BW, Rodríguez-Hoces de la Guardia A, Alter H, Chen CG, Fuentes EL, Holzer AK, et al. Accuracy and

- 1  
2  
3 Discomfort of Different Types of Intranasal Specimen Collection Methods for Molecular Influenza Testing in  
4  
5 Emergency Department Patients. *Ann Emerg Med*. 2018 Apr;71(4):509-517.e1.  
6  
7
- 8 19. LeBlanc JJ, Heinstein C, MacDonald J, Pettipas J, Hatchette TF, Patriquin G. A combined oropharyngeal/nares  
9  
10 swab is a suitable alternative to nasopharyngeal swabs for the detection of SARS-CoV-2. *J Clin Virol*.  
11  
12 2020;128(May):104442.  
13  
14
- 15 20. Vlek ALM, Wesselius TS, Achterberg R, Thijsen SFT. Combined throat/nasal swab sampling for SARS-CoV-2 is  
16  
17 equivalent to nasopharyngeal sampling. *Eur J Clin Microbiol Infect Dis Off Publ Eur Soc Clin Microbiol*. 2020  
18  
19 Jul;1-3.  
20  
21
- 22 21. Tsang NNY, So HC, Ng KY, Cowling BJ, Leung GM, Ip DKM. Diagnostic performance of different sampling  
23  
24 approaches for SARS-CoV-2 RT-PCR testing: a systematic review and meta-analysis. *Lancet Infect Dis*. 2021 Apr  
25  
26 22;  
27  
28
- 29 22. Wehrhahn MC, Robson J, Brown S, Bursle E, Byrne S, New D, et al. Self-collection: An appropriate alternative  
30  
31 during the SARS-CoV-2 pandemic. *J Clin Virol Off Publ Pan Am Soc Clin Virol*. 2020 Jul;128:104417.  
32  
33
- 34 23. Patriquin G, Davis I, Heinstein C, MacDonald J, Hatchette TF, LeBlanc JJ. Exploring alternative swabs for use in  
35  
36 SARS-CoV-2 detection from the oropharynx and anterior nares. *J Virol Methods*. 2020 Nov;285:113948.  
37  
38
- 39 24. Western Australian Department of Education. Public and non-government schools with full-time students (by  
40  
41 metropolitan, country and combined) - Semester 2, 2020. *School Information - Statistical Reports*. 2020.  
42  
43
- 44 25. Mullane MJ, Thomas HM, Epstein M, Mandzufas J, Mullan N, Whelan A, et al. DETECT Schools Study Protocol:  
45  
46 A Prospective Observational Cohort Surveillance Study Investigating the Impact of COVID-19 in Western  
47  
48 Australian Schools. *Front Public Heal*. 2021;9:16.  
49  
50
- 51 26. Harris PA, Taylor R, Thielke R, Payne J, Gonzalez N, Conde JG. Research electronic data capture (REDCap)-A  
52  
53 metadata-driven methodology and workflow process for providing translational research informatics support.  
54  
55  
56  
57  
58  
59  
60



- 1  
2  
3 J Biomed Inform. 2009;42(2):377–81.  
4  
5  
6 27. Corman VM, Landt O, Kaiser M, Molenkamp R, Meijer A, Chu DK, et al. Detection of 2019 novel coronavirus  
7  
8 (2019-nCoV) by real-time RT-PCR. Euro Surveill Bull Eur sur les Mal Transm = Eur Commun Dis Bull. 2020  
9  
10 Jan;25(3).  
11  
12  
13 28. Bai Y, Yao L, Wei T, Tian F, Jin D-Y, Chen L, et al. Presumed Asymptomatic Carrier Transmission of COVID-19.  
14  
15 JAMA. 2020 Apr;323(14):1406–7.  
16  
17  
18 29. Mizumoto K, Kagaya K, Zarebski A, Chowell G. Estimating the asymptomatic proportion of coronavirus disease  
19  
20 2019 (COVID-19) cases on board the Diamond Princess cruise ship, Yokohama, Japan, 2020. Euro Surveill Bull  
21  
22 Eur sur les Mal Transm = Eur Commun Dis Bull. 2020 Mar;25(10).  
23  
24  
25  
26 30. Moghadas SM, Fitzpatrick MC, Sah P, Pandey A, Shoukat A, Singer BH, et al. The implications of silent  
27  
28 transmission for the control of COVID-19 outbreaks. Proc Natl Acad Sci U S A. 2020 Jul;117(30):17513–5.  
29  
30  
31 31. Moisset X, Gautier N, Godet T, Parabère S, Pereira B, Meunier E, et al. Nasopharyngeal swab-induced pain for  
32  
33 SARS-CoV-2 screening: A randomised controlled trial of conventional and self-swabbing. Eur J Pain. n/a(n/a).  
34  
35  
36 32. Armitage R, Nellums LB. Considering inequalities in the school closure response to COVID-19. Vol. 8, The  
37  
38 Lancet Global Health. 2020. p. 644.  
39  
40  
41 33. Lee J. Mental health effects of school closures during COVID-19. Lancet Child Adolesc Heal. 2020 Jun  
42  
43 1;4(6):421.  
44  
45  
46 34. Jamal AJ, Mozafarihashjin M, Coomes E, Anceva-Sami S, Barati S, Crowl G, et al. Sensitivity of midturbinate  
47  
48 versus nasopharyngeal swabs for the detection of severe acute respiratory syndrome coronavirus 2 (SARS-  
49  
50 CoV-2). Infect Control Hosp Epidemiol. 2020 Nov;1–3.  
51  
52  
53  
54 35. Garnett L, Bello A, Tran KN, Audet J, Leung A, Schiffman Z, et al. Comparison analysis of different swabs and  
55  
56  
57  
58  
59  
60

- 1  
2  
3 transport mediums suitable for SARS-CoV-2 testing following shortages. J Virol Methods. 2020  
4  
5 Nov;285:113947.  
6  
7  
8 36. Moore C, Corden S, Sinha J, Jones R. Dry cotton or flocked respiratory swabs as a simple collection technique  
9  
10 for the molecular detection of respiratory viruses using real-time NASBA. J Virol Methods. 2008  
11  
12 Nov;153(2):84–9.  
13  
14  
15 37. Braz-Silva PH, Mamana AC, Romano CM, Felix AC, de Paula A V, Ferreira NE, et al. Performance of at-home self-  
16  
17 collected saliva and nasal-oropharyngeal swabs in the surveillance of COVID-19. J Oral Microbiol. 2020  
18  
19 Dec;13(1):1858.  
20  
21  
22  
23 38. Mina MJ, Andersen KG. COVID-19 testing: One size does not fit all. Science (80- ). 2021;371(6525):126–7.  
24  
25  
26  
27  
28

29 *Figure 1. Geographic distribution of schools participating in DETECT Schools Study swabbing.*

30  
31  
32  
33 *Figure 2. Distribution of survey responses regarding A) self-reported discomfort (student and staff); B) students' concern*  
34 *about being swabbed (self- and parent-reported); and C) students' concern regarding swabbing staff use of PPE.*  
35  
36  
37  
38  
39  
40  
41  
42  
43  
44  
45  
46  
47  
48  
49  
50  
51  
52  
53  
54  
55  
56  
57  
58  
59  
60

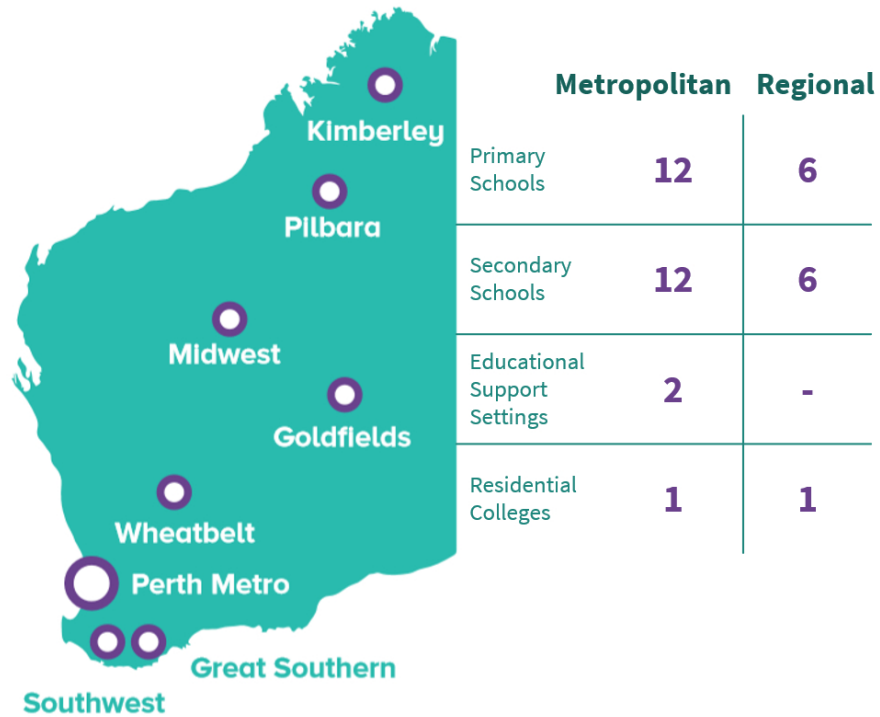

Figure 1. Geographic distribution of schools participating in DETECT Schools Study swabbing.

184x137mm (150 x 150 DPI)

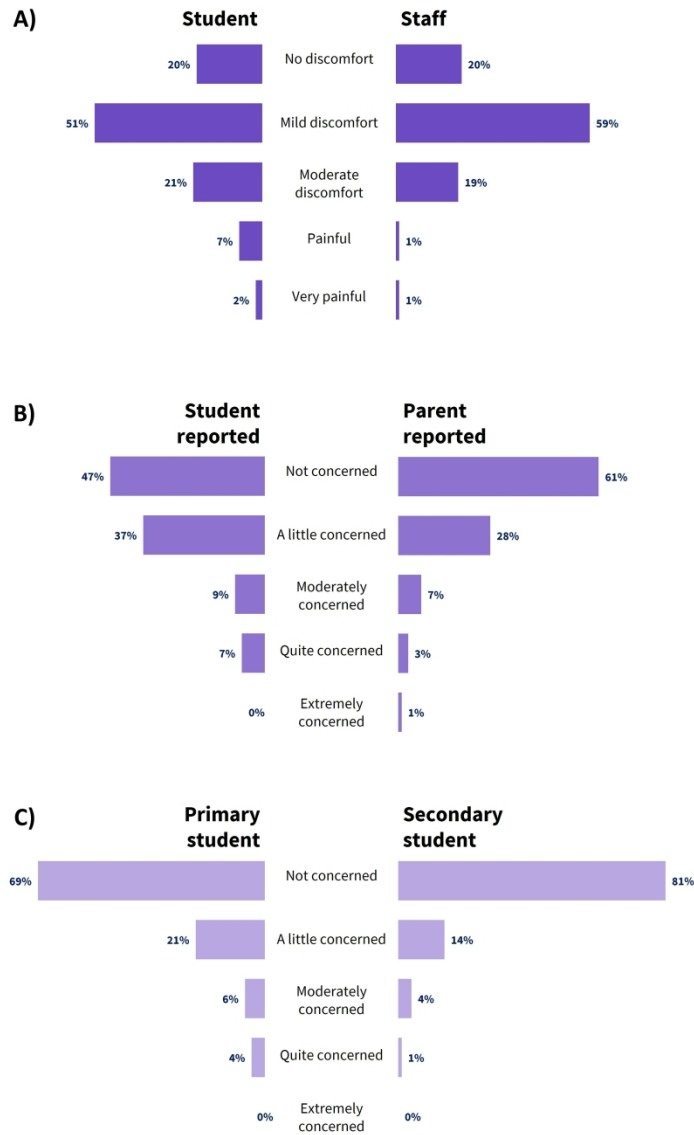

Figure 2. Distribution of survey responses regarding A) self-reported discomfort (student and staff); B) students' concern about being swabbed (self- and parent-reported); and C) students' concern regarding swabbing staff use of PPE.

254x397mm (300 x 300 DPI)

## STROBE Statement—checklist of items that should be included in reports of observational studies

|                           | Item No | Recommendation                                                                                                                                                                                                                                                                                                                                                                                                                                                         |                     | Page                    |
|---------------------------|---------|------------------------------------------------------------------------------------------------------------------------------------------------------------------------------------------------------------------------------------------------------------------------------------------------------------------------------------------------------------------------------------------------------------------------------------------------------------------------|---------------------|-------------------------|
| <b>Title and abstract</b> | 1       | (a) Indicate the study's design with a commonly used term in the title or the abstract                                                                                                                                                                                                                                                                                                                                                                                 | YES                 | 2                       |
|                           |         | (b) Provide in the abstract an informative and balanced summary of what was done and what was found                                                                                                                                                                                                                                                                                                                                                                    | YES                 | 2                       |
| <b>Introduction</b>       |         |                                                                                                                                                                                                                                                                                                                                                                                                                                                                        |                     |                         |
| Background/rationale      | 2       | Explain the scientific background and rationale for the investigation being reported                                                                                                                                                                                                                                                                                                                                                                                   | YES                 | 4                       |
| Objectives                | 3       | State specific objectives, including any prespecified hypotheses                                                                                                                                                                                                                                                                                                                                                                                                       | YES                 | 5                       |
| <b>Methods</b>            |         |                                                                                                                                                                                                                                                                                                                                                                                                                                                                        |                     |                         |
| Study design              | 4       | Present key elements of study design early in the paper                                                                                                                                                                                                                                                                                                                                                                                                                | YES                 | 5                       |
| Setting                   | 5       | Describe the setting, locations, and relevant dates, including periods of recruitment, exposure, follow-up, and data collection                                                                                                                                                                                                                                                                                                                                        | YES                 | 6                       |
| Participants              | 6       | (a) <i>Cohort study</i> —Give the eligibility criteria, and the sources and methods of selection of participants. Describe methods of follow-up<br><i>Case-control study</i> —Give the eligibility criteria, and the sources and methods of case ascertainment and control selection. Give the rationale for the choice of cases and controls<br><i>Cross-sectional study</i> —Give the eligibility criteria, and the sources and methods of selection of participants | YES                 | 5-6                     |
|                           |         | (b) <i>Cohort study</i> —For matched studies, give matching criteria and number of exposed and unexposed<br><i>Case-control study</i> —For matched studies, give matching criteria and the number of controls per case                                                                                                                                                                                                                                                 |                     |                         |
| Variables                 | 7       | Clearly define all outcomes, exposures, predictors, potential confounders, and effect modifiers. Give diagnostic criteria, if applicable                                                                                                                                                                                                                                                                                                                               | NA                  |                         |
| Data sources/measurement  | 8*      | For each variable of interest, give sources of data and details of methods of assessment (measurement). Describe comparability of assessment methods if there is more than one group                                                                                                                                                                                                                                                                                   | YES                 | 7                       |
| Bias                      | 9       | Describe any efforts to address potential sources of bias                                                                                                                                                                                                                                                                                                                                                                                                              | YES                 | 5                       |
| Study size                | 10      | Explain how the study size was arrived at                                                                                                                                                                                                                                                                                                                                                                                                                              | YES                 | (explained in protocol) |
| Quantitative variables    | 11      | Explain how quantitative variables were handled in the analyses. If applicable, describe which groupings were chosen and why                                                                                                                                                                                                                                                                                                                                           | YES                 | (explained in protocol) |
| Statistical methods       | 12      | (a) Describe all statistical methods, including those used to control for confounding                                                                                                                                                                                                                                                                                                                                                                                  | NA<br>(descriptive) |                         |

1  
2  
3  
4  
5  
6  
7  
8  
9  
10  
11  
12  
13  
14  
15  
16  
17  
18  
19  
20  
21  
22  
23  
24  
25  
26  
27  
28  
29  
30  
31  
32  
33  
34  
35  
36  
37  
38  
39  
40  
41  
42  
43  
44  
45  
46  
47  
48  
49  
50  
51  
52  
53  
54  
55  
56  
57  
58  
59  
60

|                                                                                                              |    |
|--------------------------------------------------------------------------------------------------------------|----|
| (b) Describe any methods used to examine subgroups and interactions                                          | NA |
| (c) Explain how missing data were addressed                                                                  | NA |
| (d) <i>Cohort study</i> —If applicable, explain how loss to follow-up was addressed                          | NA |
| <i>Case-control study</i> —If applicable, explain how matching of cases and controls was addressed           |    |
| <i>Cross-sectional study</i> —If applicable, describe analytical methods taking account of sampling strategy |    |
| (e) Describe any sensitivity analyses                                                                        |    |

**Results**

|                   |     |                                                                                                                                                                                                              |     |    |
|-------------------|-----|--------------------------------------------------------------------------------------------------------------------------------------------------------------------------------------------------------------|-----|----|
| Participants      | 13* | (a) Report numbers of individuals at each stage of study—eg numbers potentially eligible, examined for eligibility, confirmed eligible, included in the study, completing follow-up, and analysed            | YES | 8  |
|                   |     | (b) Give reasons for non-participation at each stage                                                                                                                                                         | NA  |    |
|                   |     | (c) Consider use of a flow diagram                                                                                                                                                                           |     |    |
| Descriptive data  | 14* | (a) Give characteristics of study participants (eg demographic, clinical, social) and information on exposures and potential confounders                                                                     | YES | 8  |
|                   |     | (b) Indicate number of participants with missing data for each variable of interest                                                                                                                          | YES | 8  |
|                   |     | (c) <i>Cohort study</i> —Summarise follow-up time (eg, average and total amount)                                                                                                                             | NA  |    |
| Outcome data      | 15* | <i>Cohort study</i> —Report numbers of outcome events or summary measures over time                                                                                                                          | NA  |    |
|                   |     | <i>Case-control study</i> —Report numbers in each exposure category, or summary measures of exposure                                                                                                         | NA  |    |
|                   |     | <i>Cross-sectional study</i> —Report numbers of outcome events or summary measures                                                                                                                           | NA  |    |
| Main results      | 16  | (a) Give unadjusted estimates and, if applicable, confounder-adjusted estimates and their precision (eg, 95% confidence interval). Make clear which confounders were adjusted for and why they were included | NA  |    |
|                   |     | (b) Report category boundaries when continuous variables were categorized                                                                                                                                    | NA  |    |
|                   |     | (c) If relevant, consider translating estimates of relative risk into absolute risk for a meaningful time period                                                                                             | NA  |    |
| Other analyses    | 17  | Report other analyses done—eg analyses of subgroups and interactions, and sensitivity analyses                                                                                                               | NA  |    |
| <b>Discussion</b> |     |                                                                                                                                                                                                              |     |    |
| Key results       | 18  | Summarise key results with reference to study objectives                                                                                                                                                     | YES | 9  |
| Limitations       | 19  | Discuss limitations of the study, taking into account sources of potential bias or imprecision. Discuss both direction and magnitude of any potential bias                                                   | YES | 11 |
| Interpretation    | 20  | Give a cautious overall interpretation of results considering objectives, limitations, multiplicity of analyses, results from similar studies, and other relevant evidence                                   | YES | 10 |
| Generalisability  | 21  | Discuss the generalisability (external validity) of the study results                                                                                                                                        | YES | 11 |

1  
2  
3  
4  
5  
6  
7  
8  
9  
10  
11  
12  
13  
14  
15  
16  
17  
18  
19  
20  
21  
22  
23  
24  
25  
26  
27  
28  
29  
30  
31  
32  
33  
34  
35  
36  
37  
38  
39  
40  
41  
42  
43  
44  
45  
46  
47  
48  
49  
50  
51  
52  
53  
54  
55  
56  
57  
58  
59  
60

## Other information

|         |    |                                                                                                                                                               |     |    |
|---------|----|---------------------------------------------------------------------------------------------------------------------------------------------------------------|-----|----|
| Funding | 22 | Give the source of funding and the role of the funders for the present study and, if applicable, for the original study on which the present article is based | YES | 12 |
|---------|----|---------------------------------------------------------------------------------------------------------------------------------------------------------------|-----|----|

\*Give information separately for cases and controls in case-control studies and, if applicable, for exposed and unexposed groups in cohort and cross-sectional studies.

**Note:** An Explanation and Elaboration article discusses each checklist item and gives methodological background and published examples of transparent reporting. The STROBE checklist is best used in conjunction with this article (freely available on the Web sites of PLoS Medicine at <http://www.plosmedicine.org/>, Annals of Internal Medicine at <http://www.annals.org/>, and Epidemiology at <http://www.epidem.com/>). Information on the STROBE Initiative is available at [www.strobe-statement.org](http://www.strobe-statement.org).

For peer review only
